# Supplementary material
Source: publisher figshare collection journal article supplement (https://acs.figshare.com/ndownloader/files/4628725)

# **Homoallylic Nitron Isomerization: Convenient Enantioselective Synthesis of Homoallylic Nitrones and Homoallylic Hydroxylamines**

Hin-Soon Cheng, Ai-Hua Seow and Teck-Peng Loh

Supplementary Material

NMR Spectra

<sup>1</sup>H (400MHz)

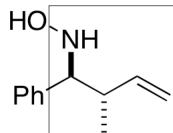

*Anti-R-2*

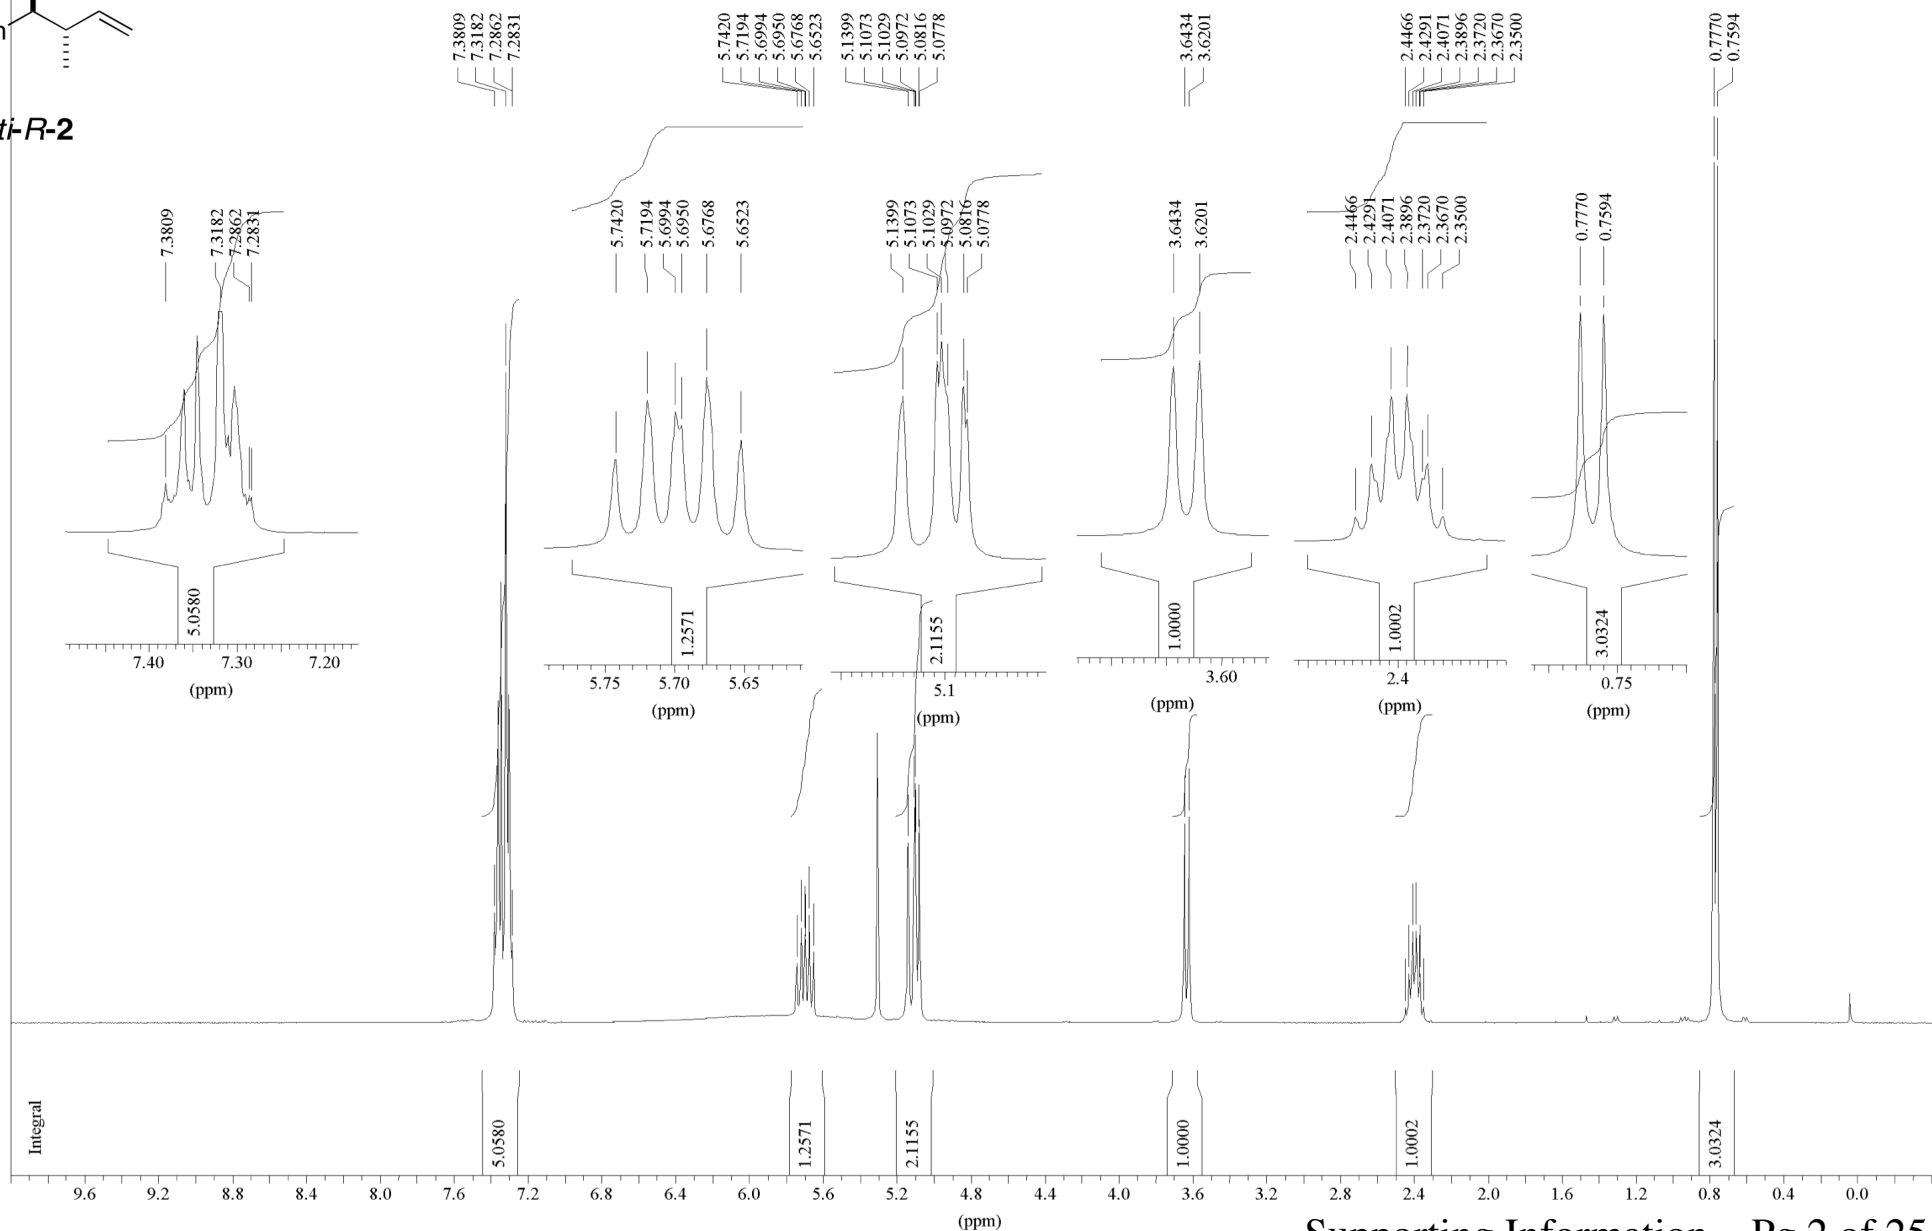

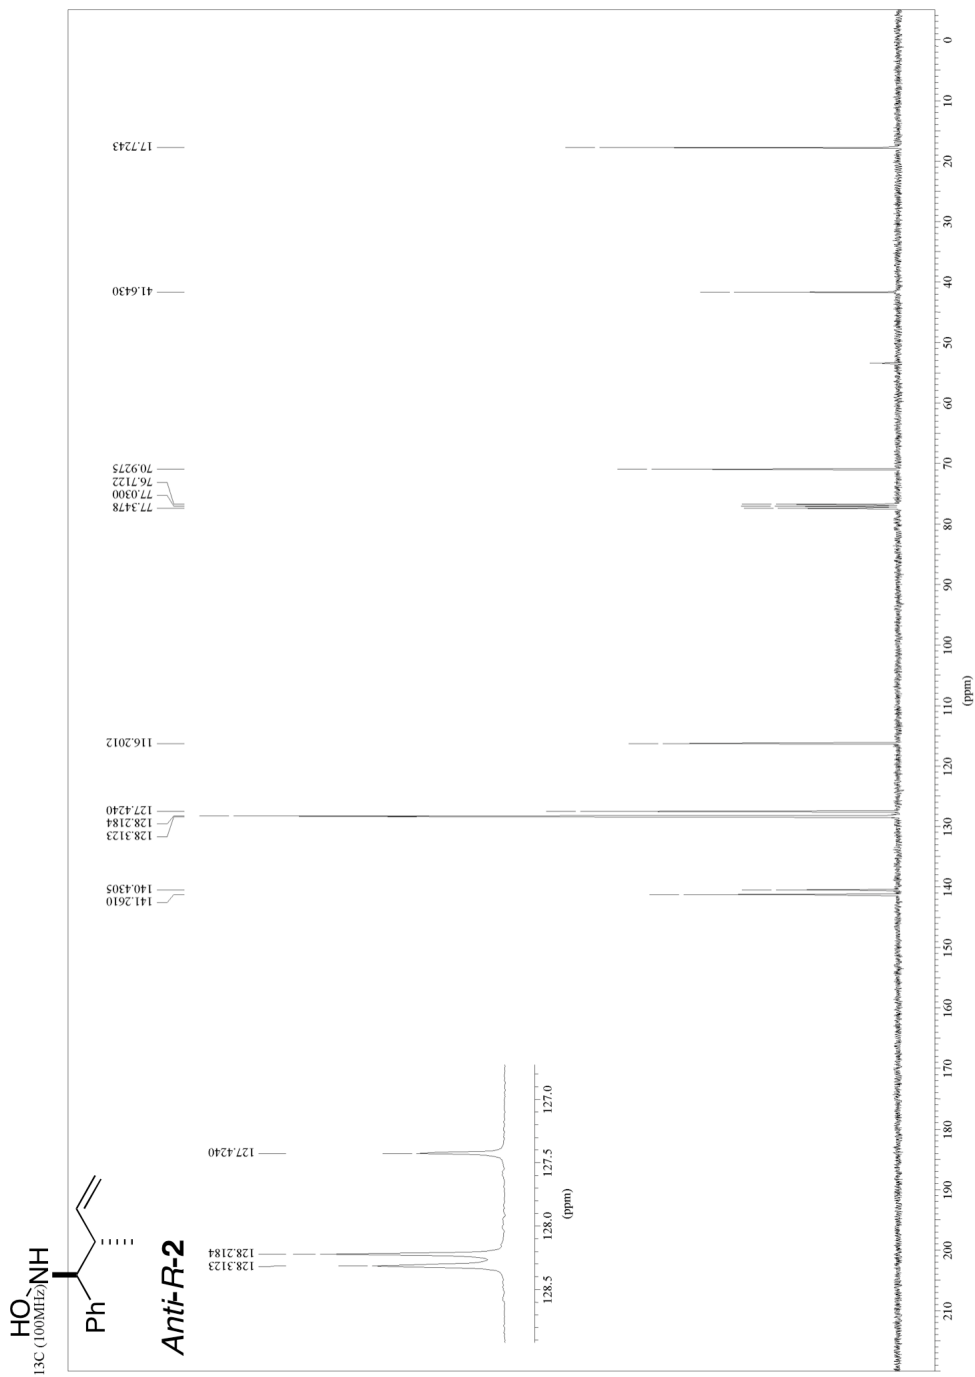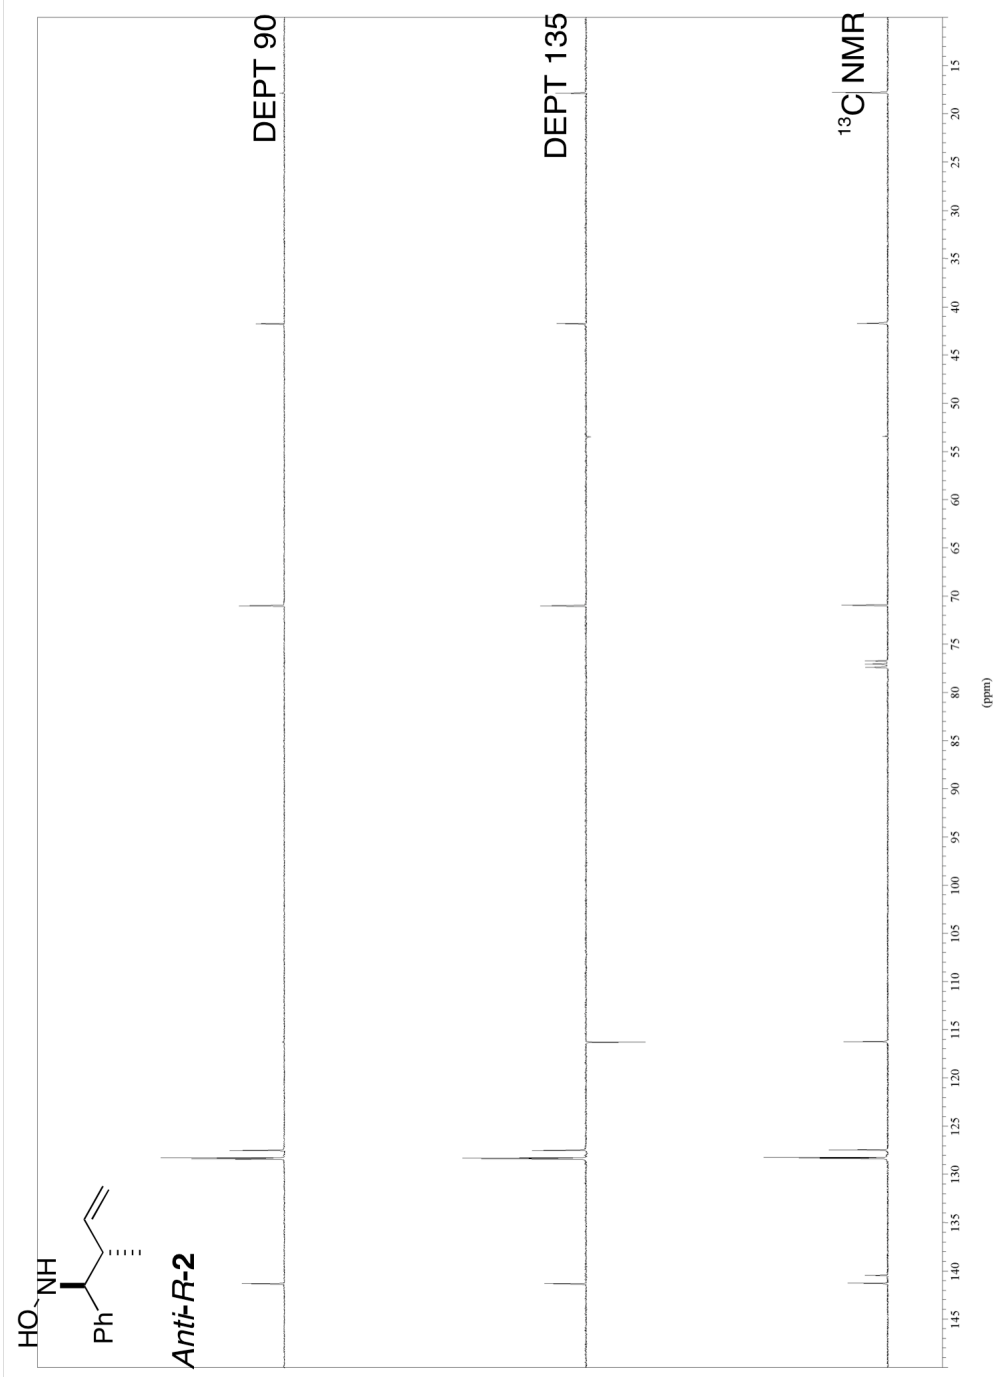

<sup>1</sup>H (400MHz)

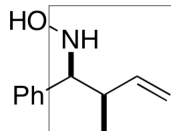

*syn-R-2*

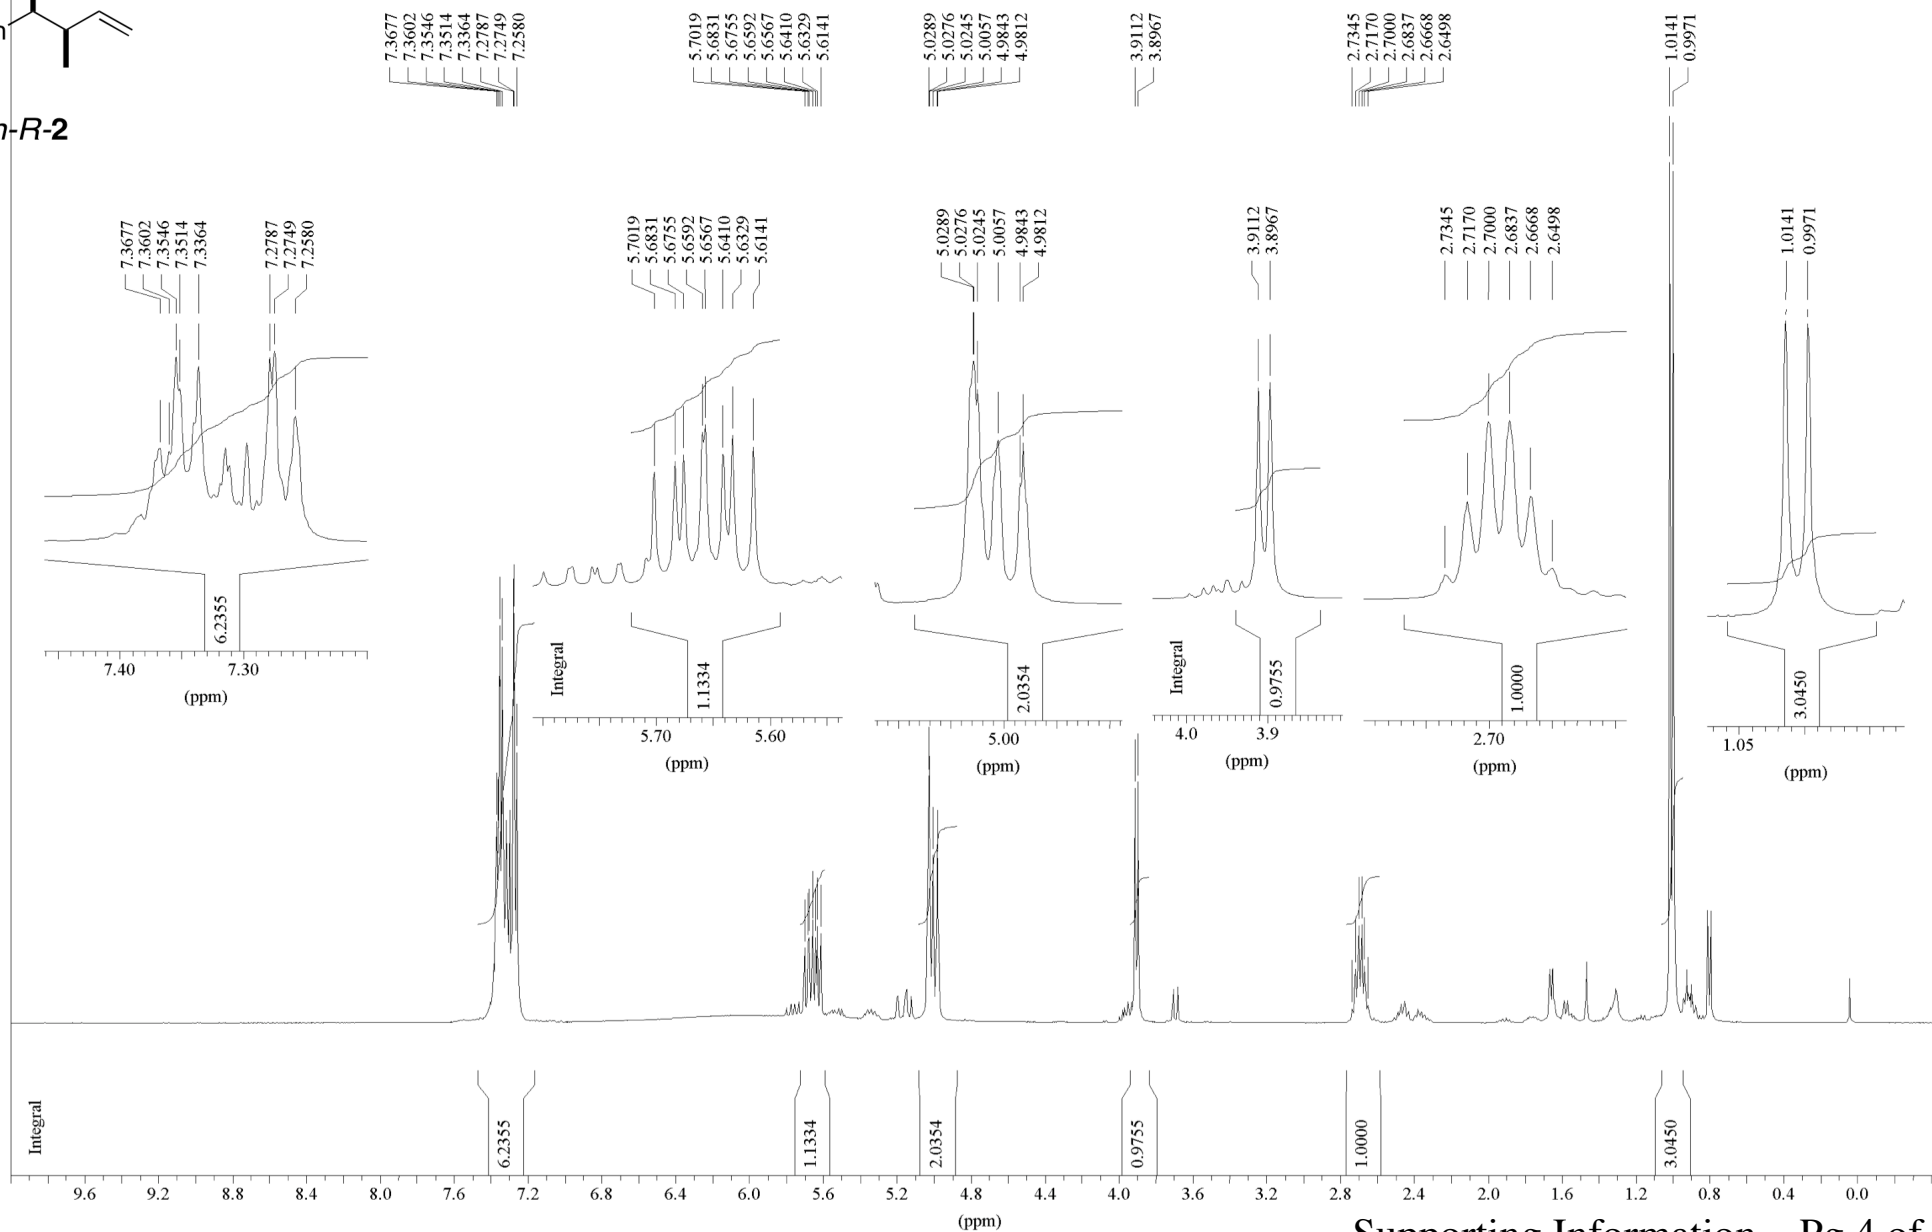

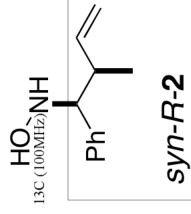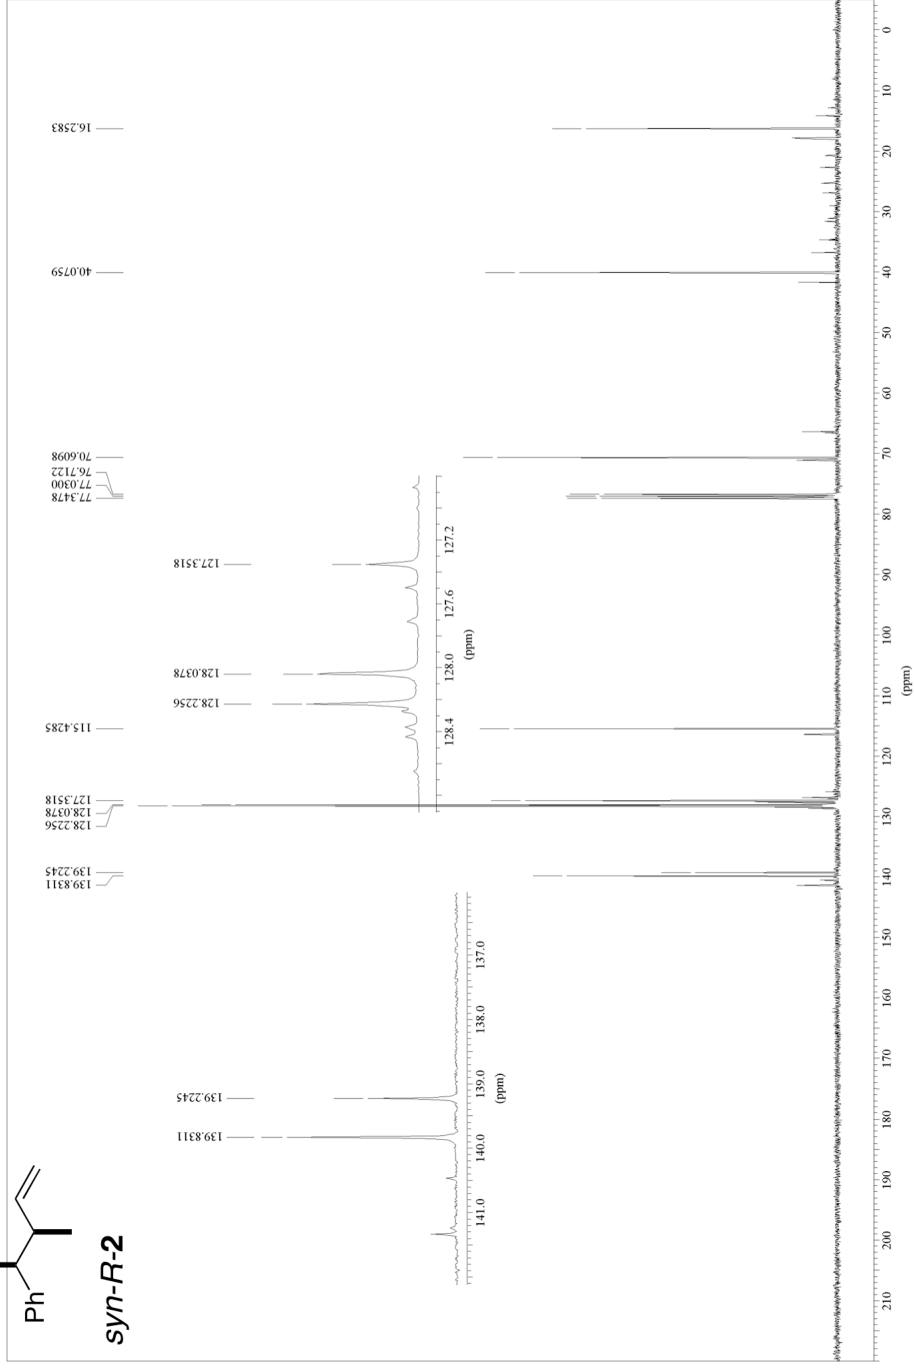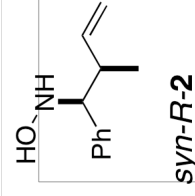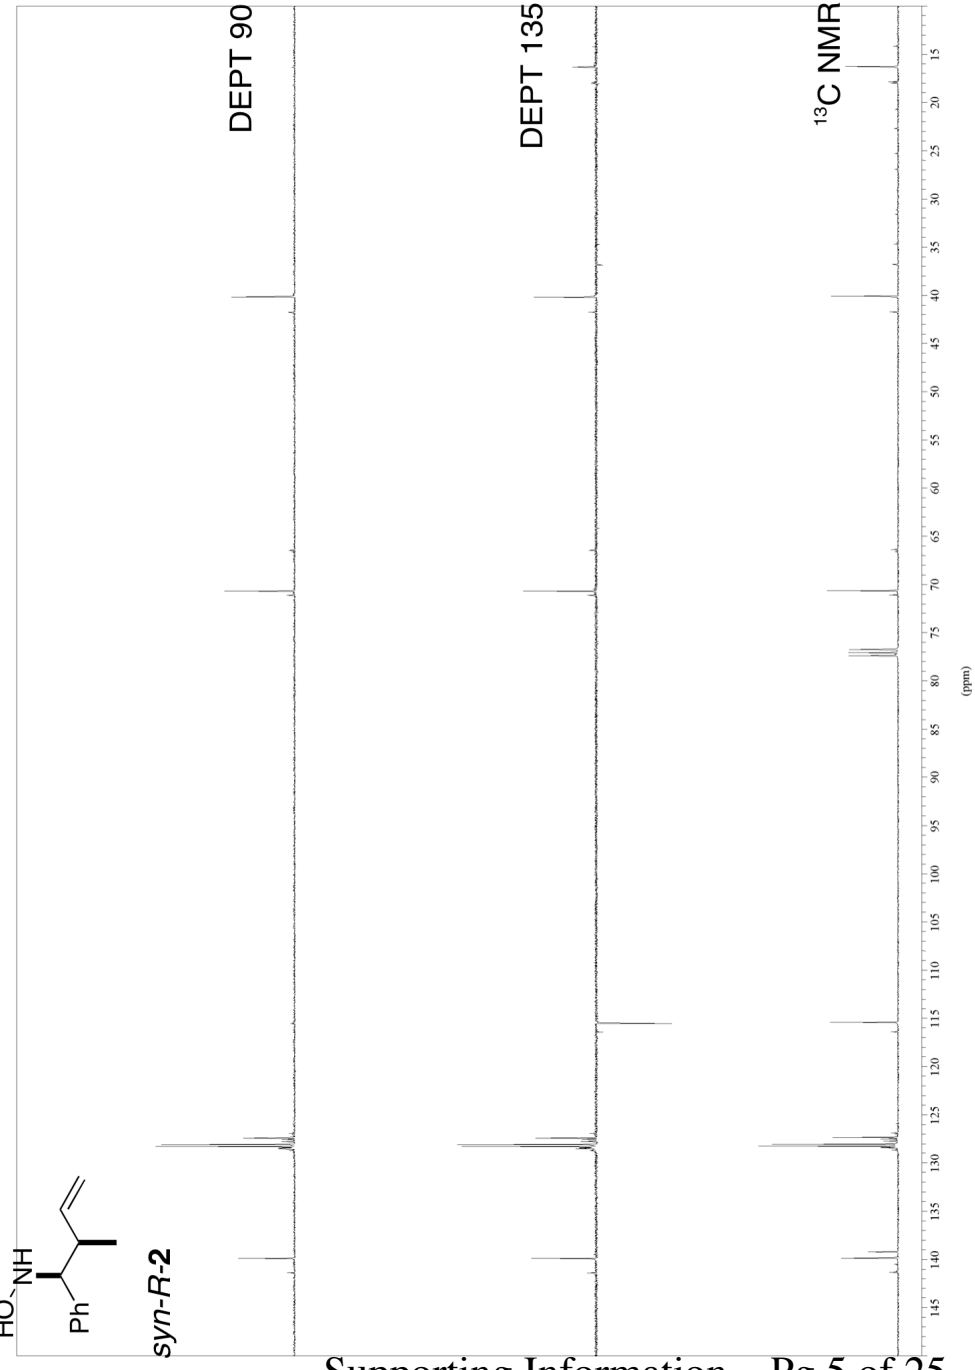

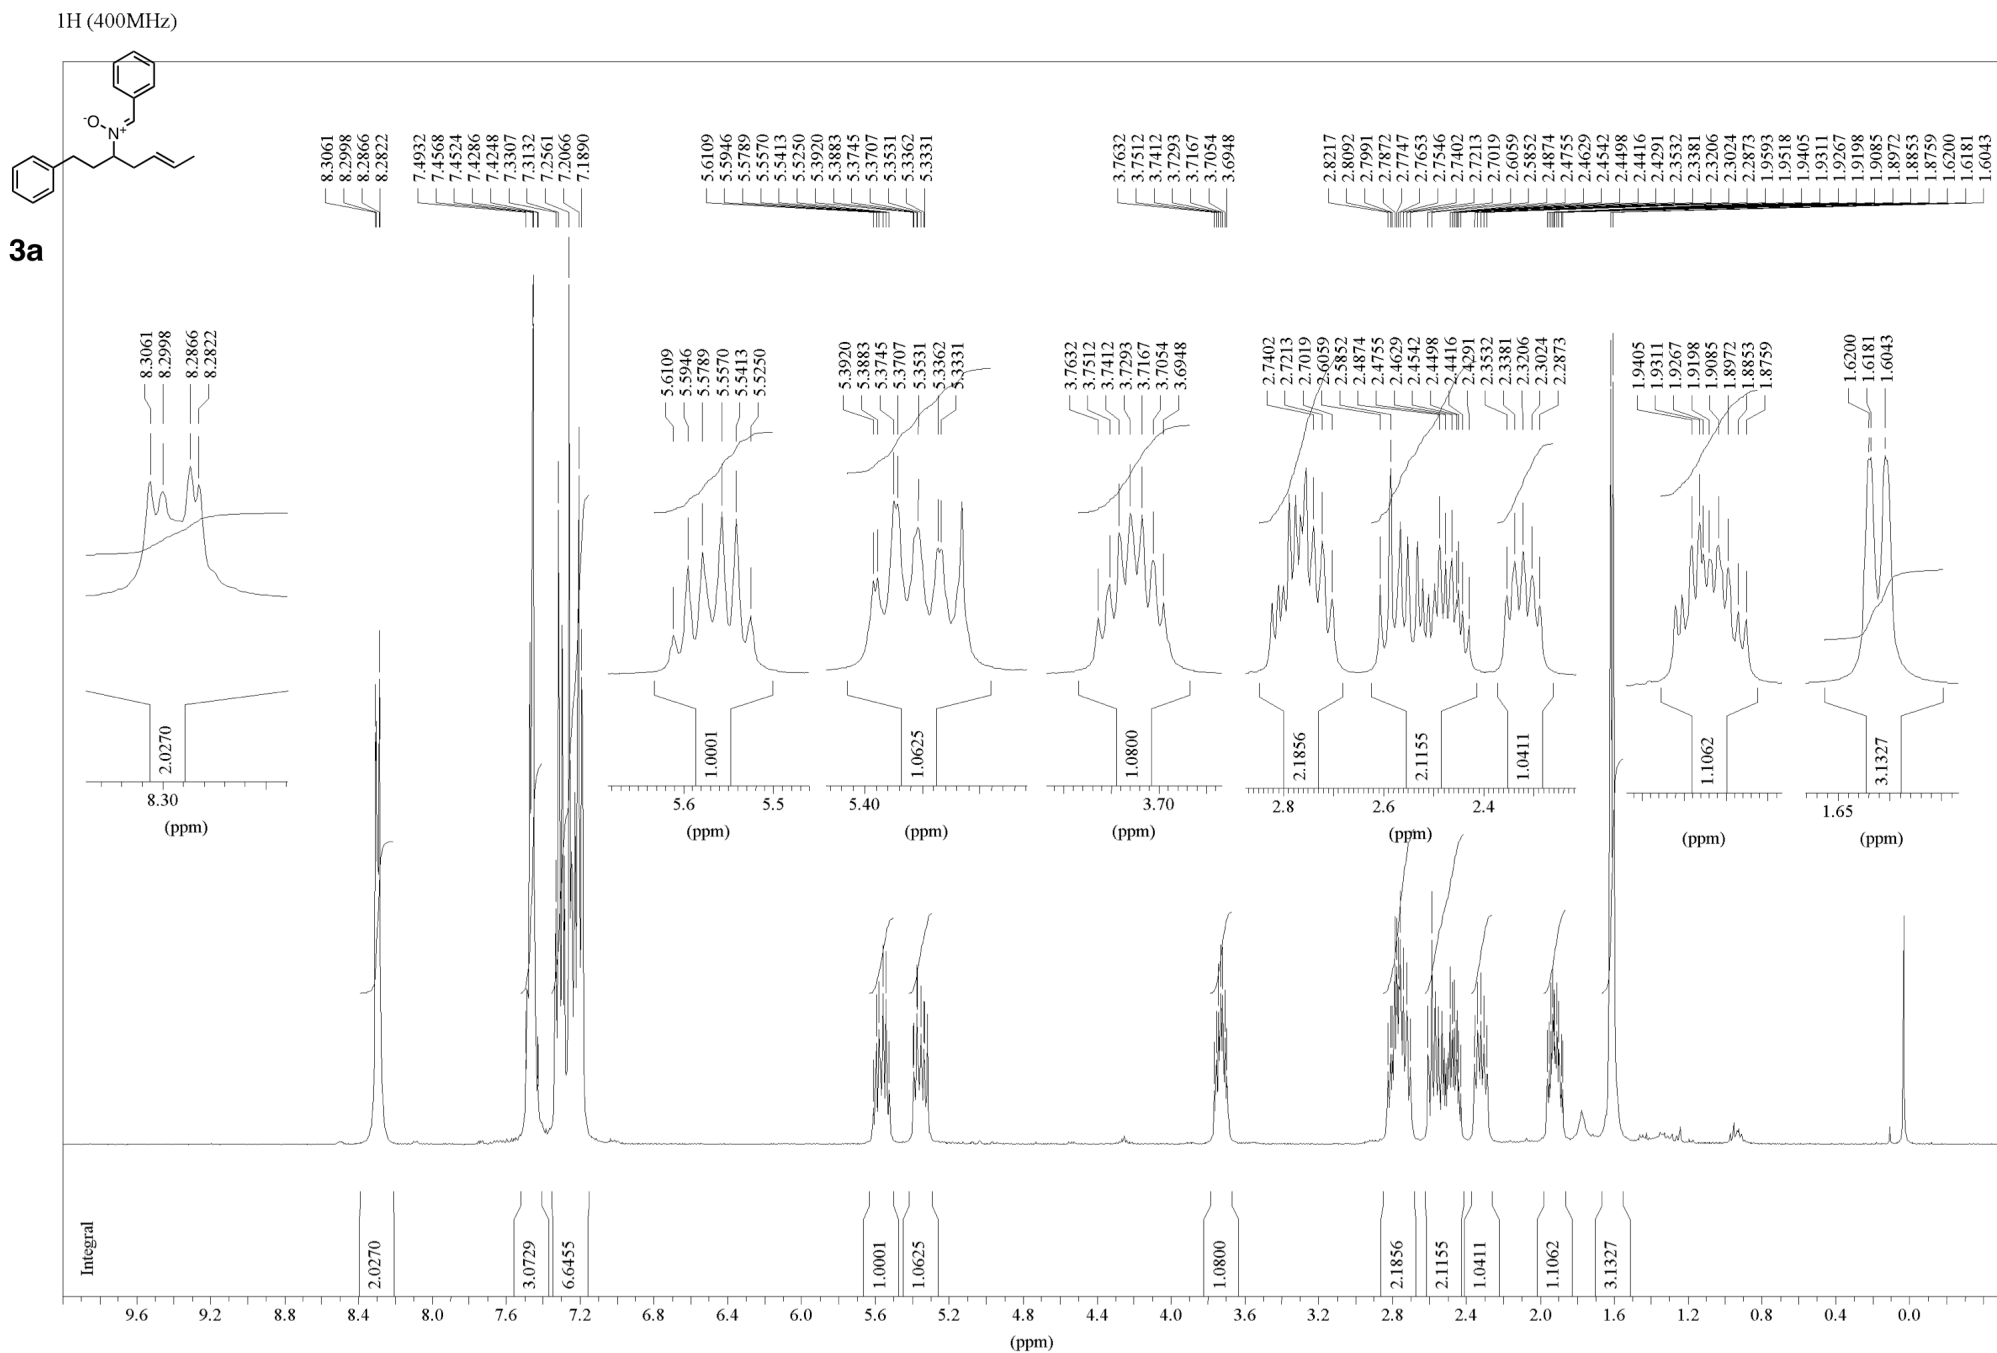

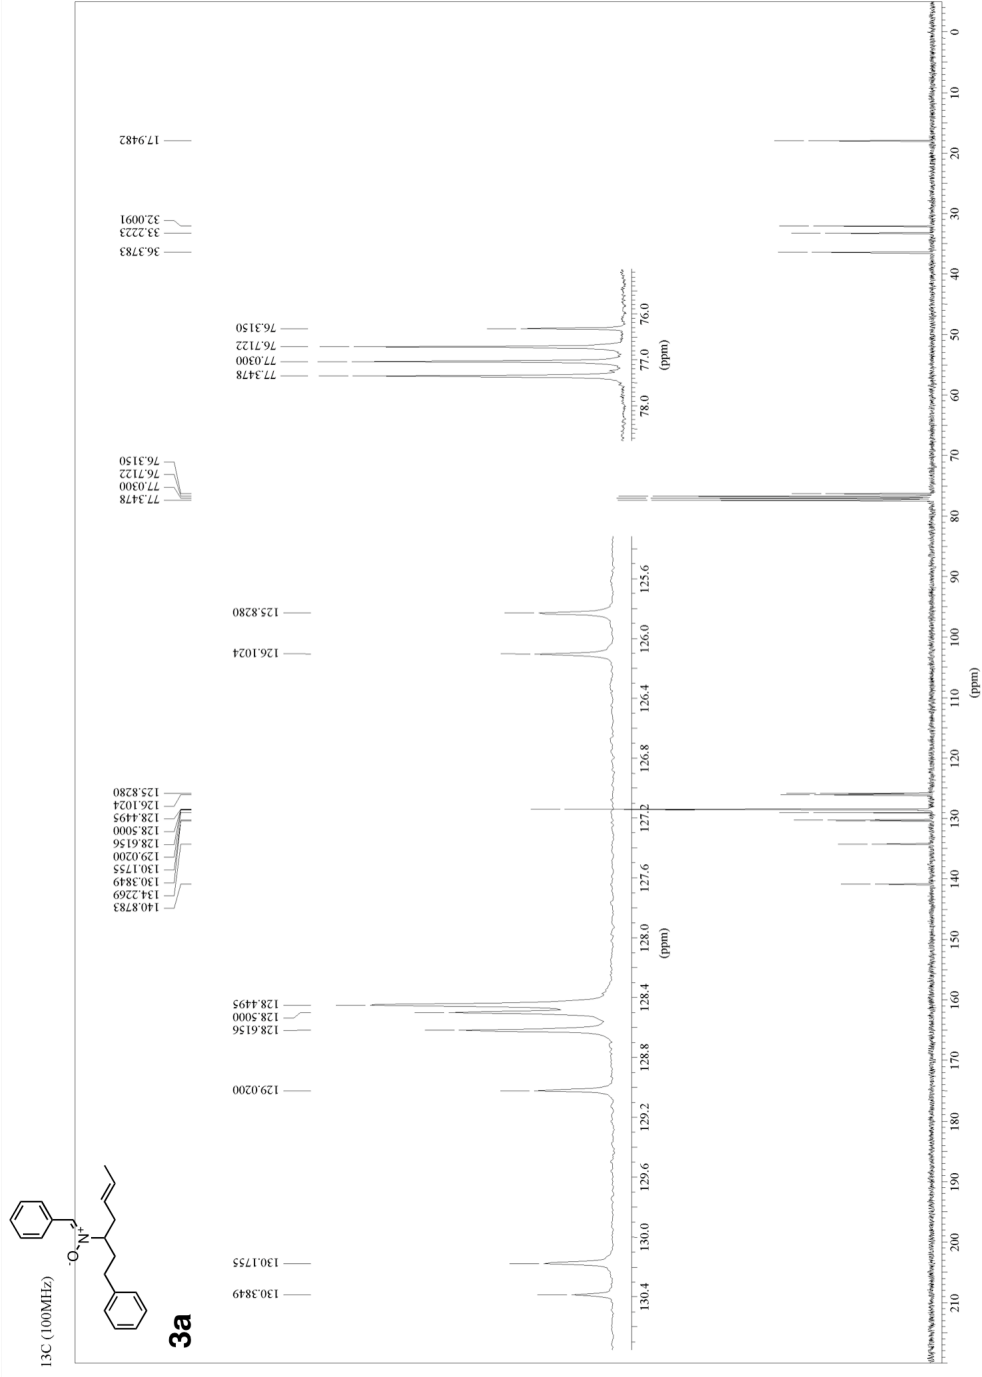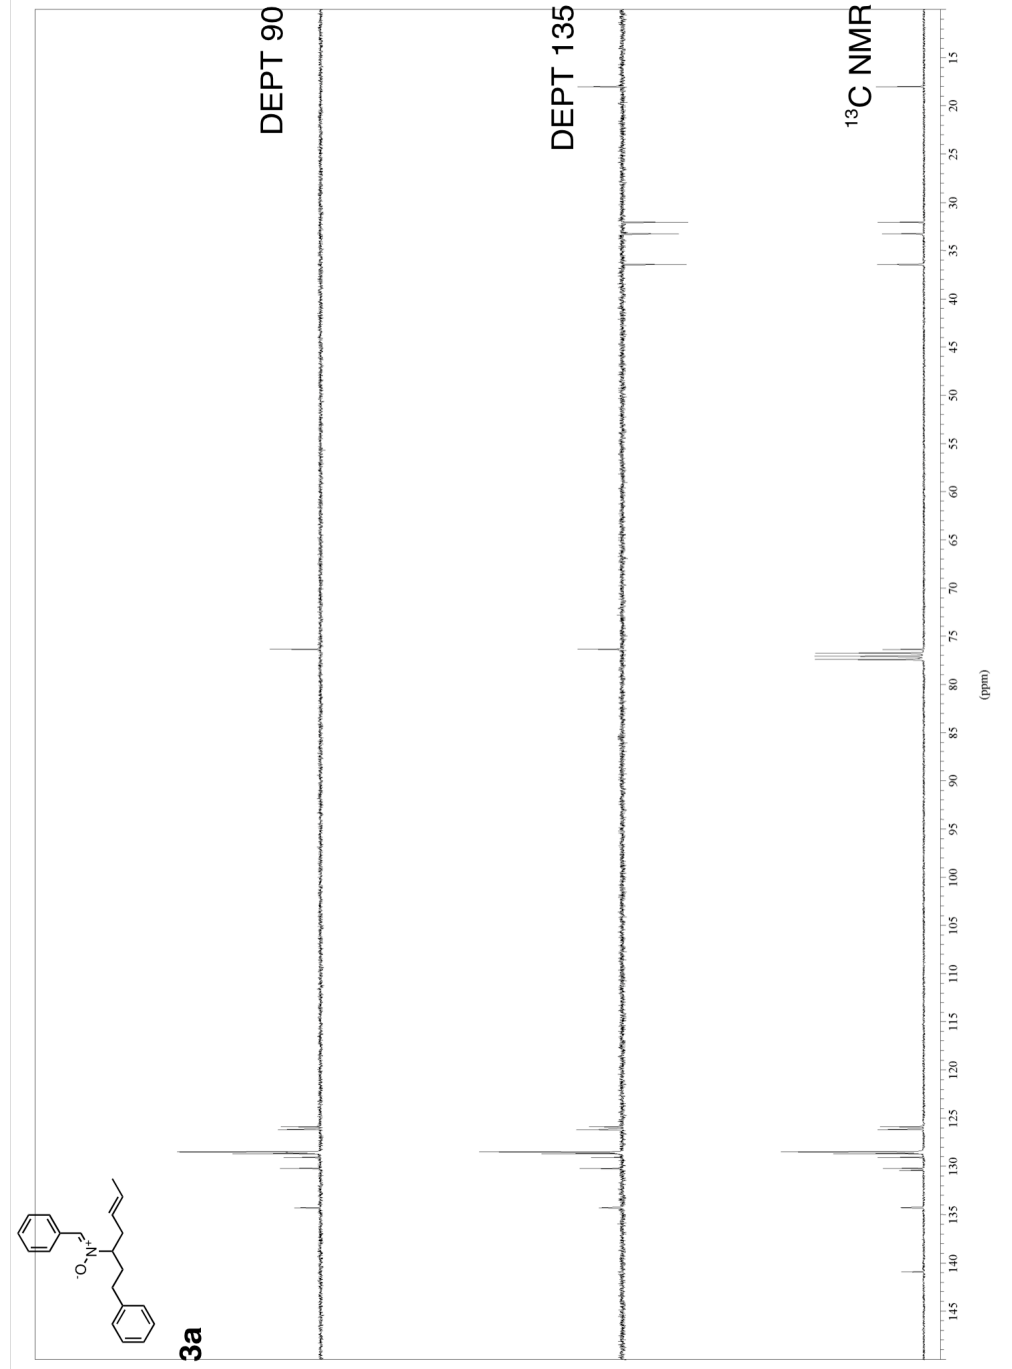

<sup>1</sup>H NMR (300MHz)

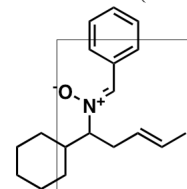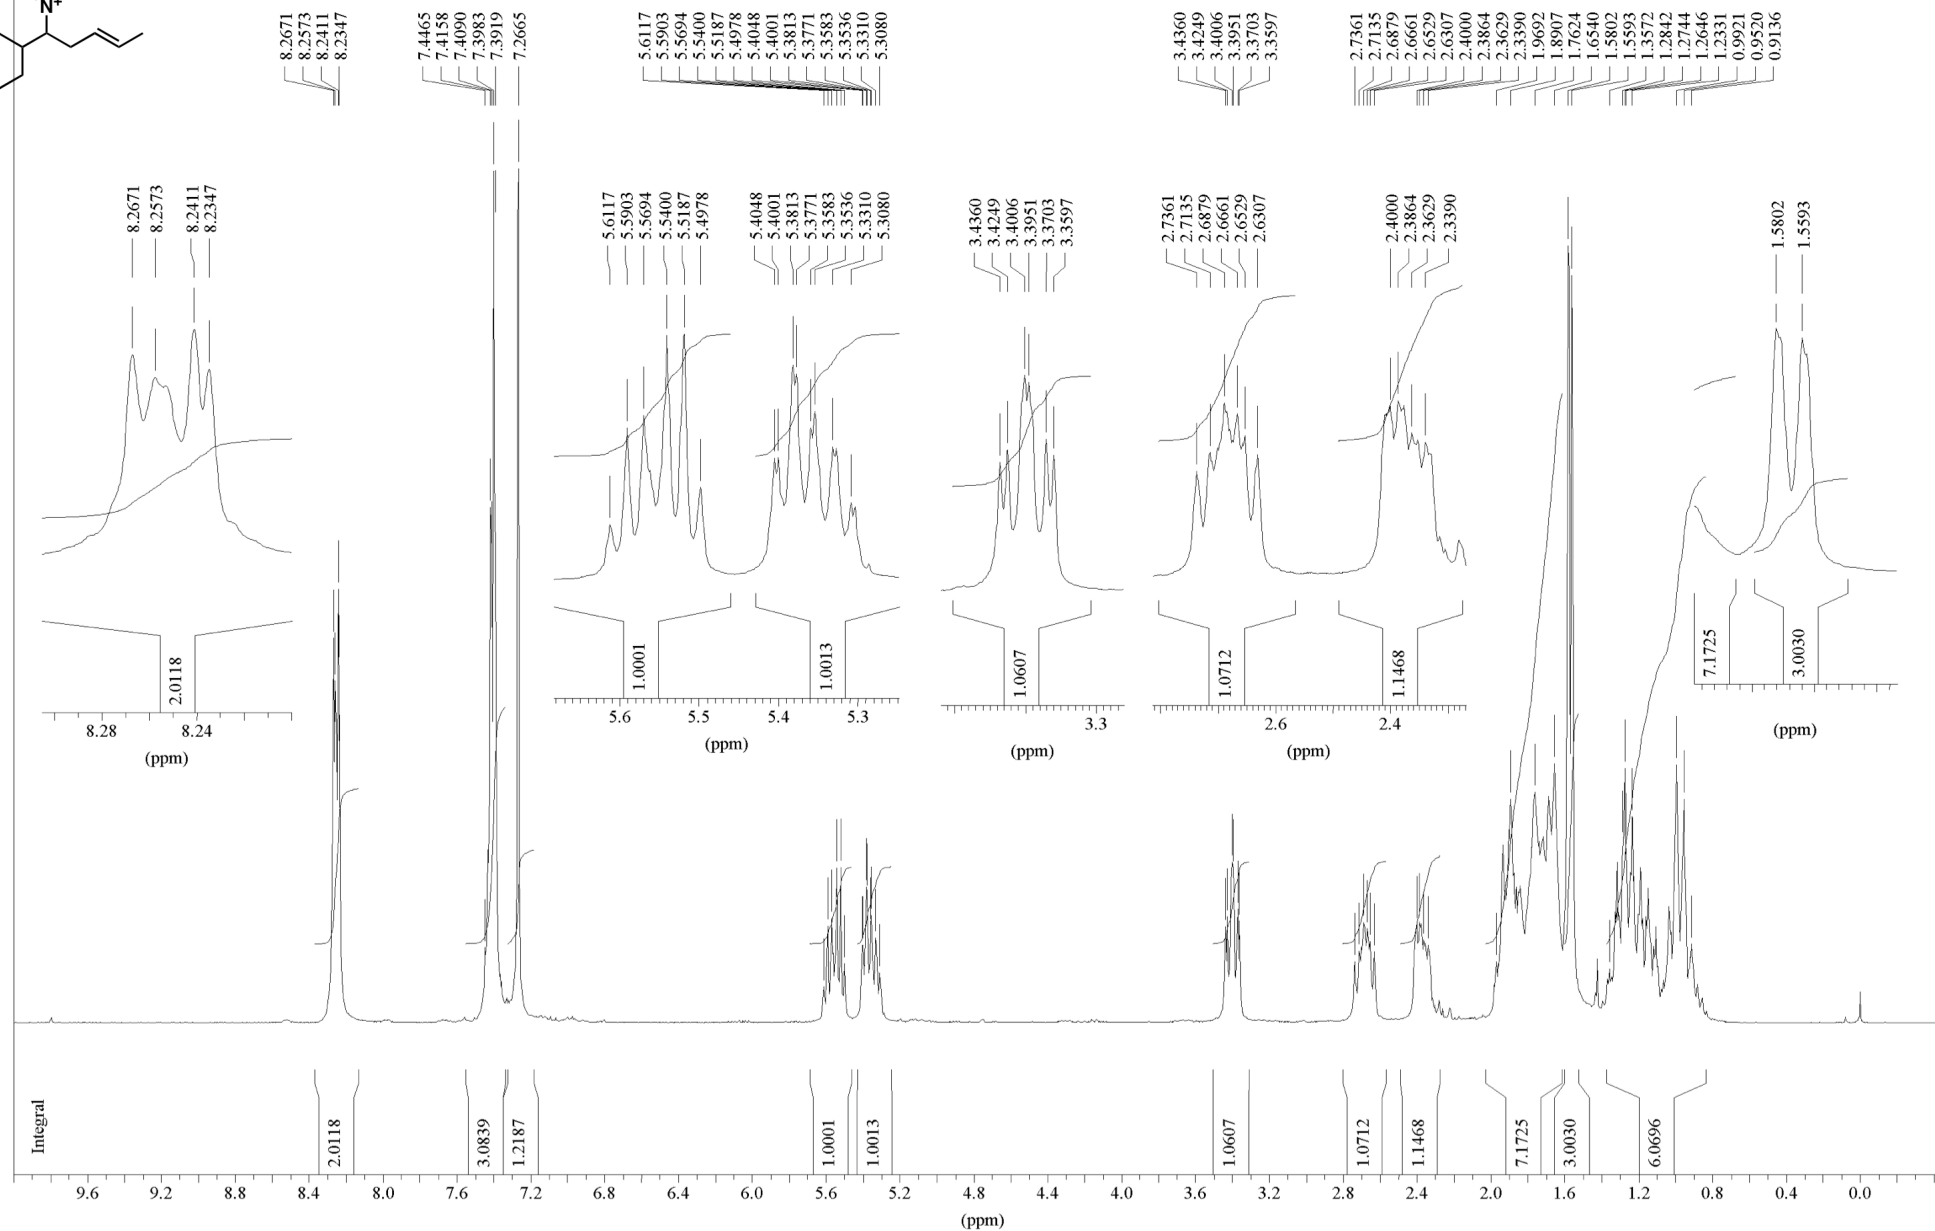

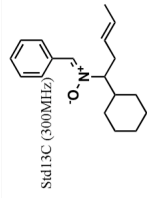

134.2616  
130.3907  
129.9518  
128.5351  
128.4353  
128.3888  
126.4135

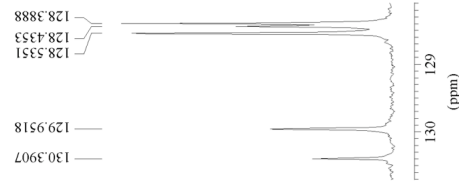

83.0757  
77.4557  
77.0300  
76.6043

39.3655  
32.7744  
29.8214  
29.6485  
26.2033  
25.9771  
25.6778  
17.8962

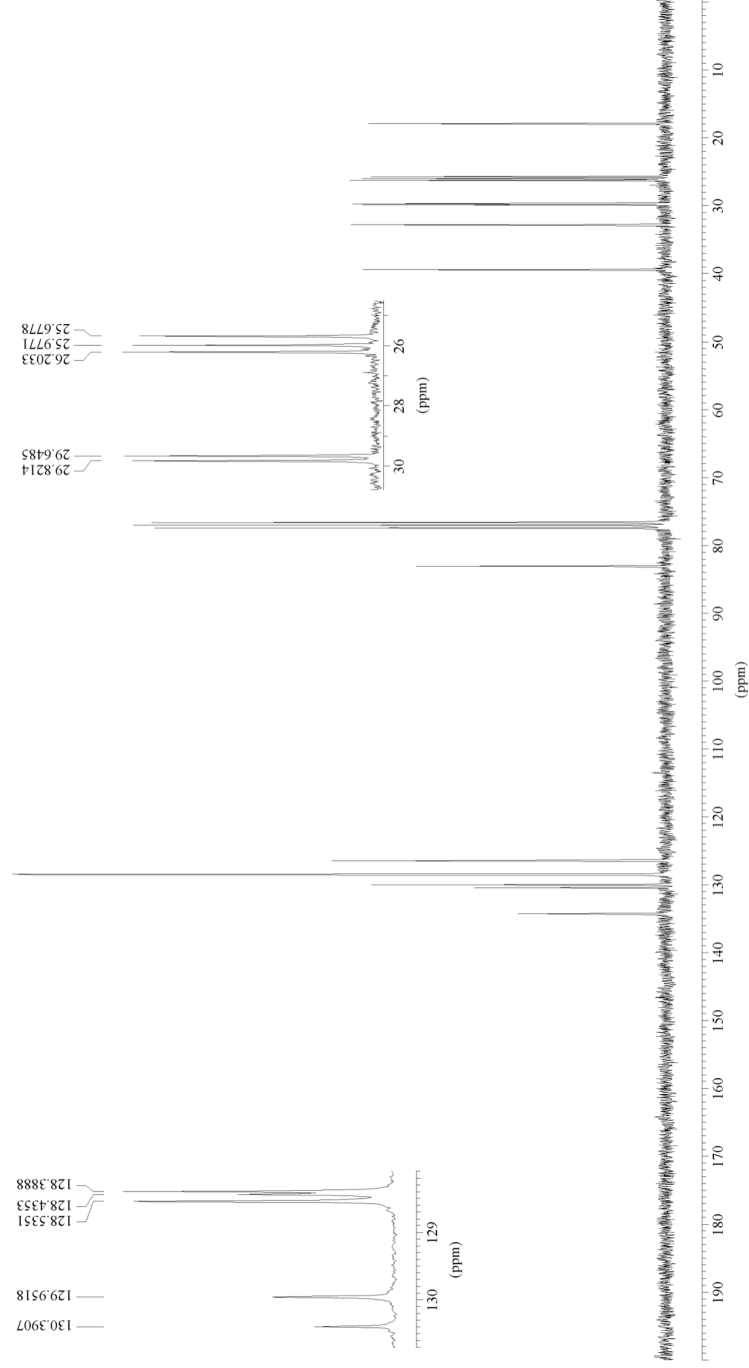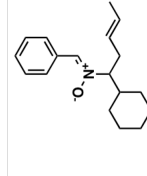

DEPT 90

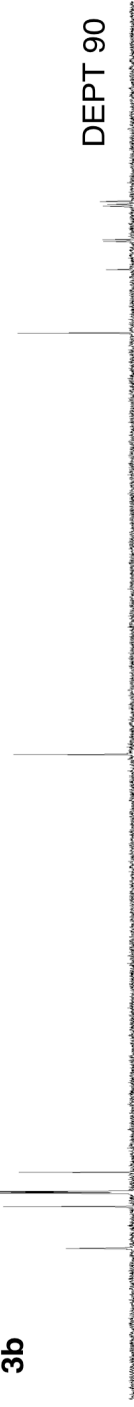

DEPT 135

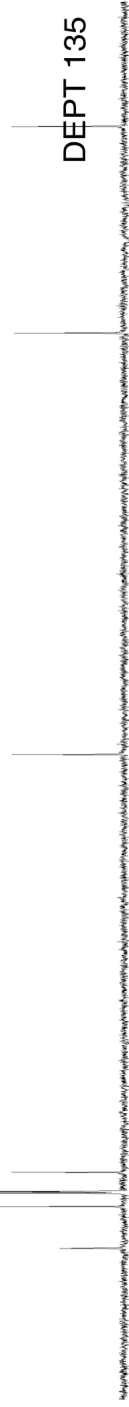

13C NMR

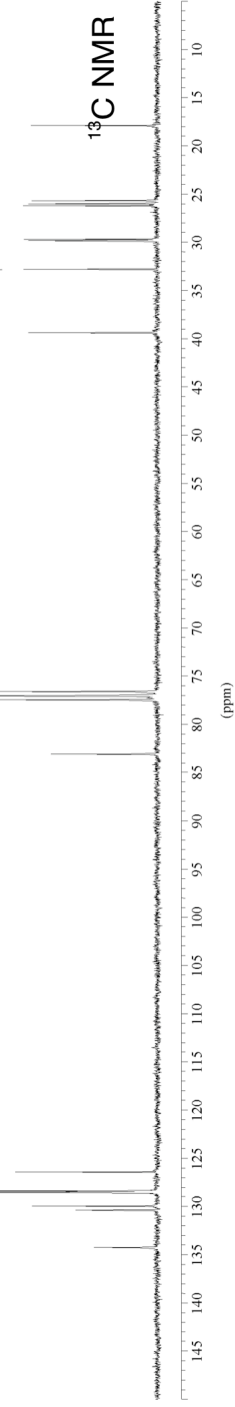

<sup>1</sup>H NMR (300MHz)

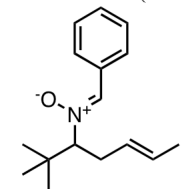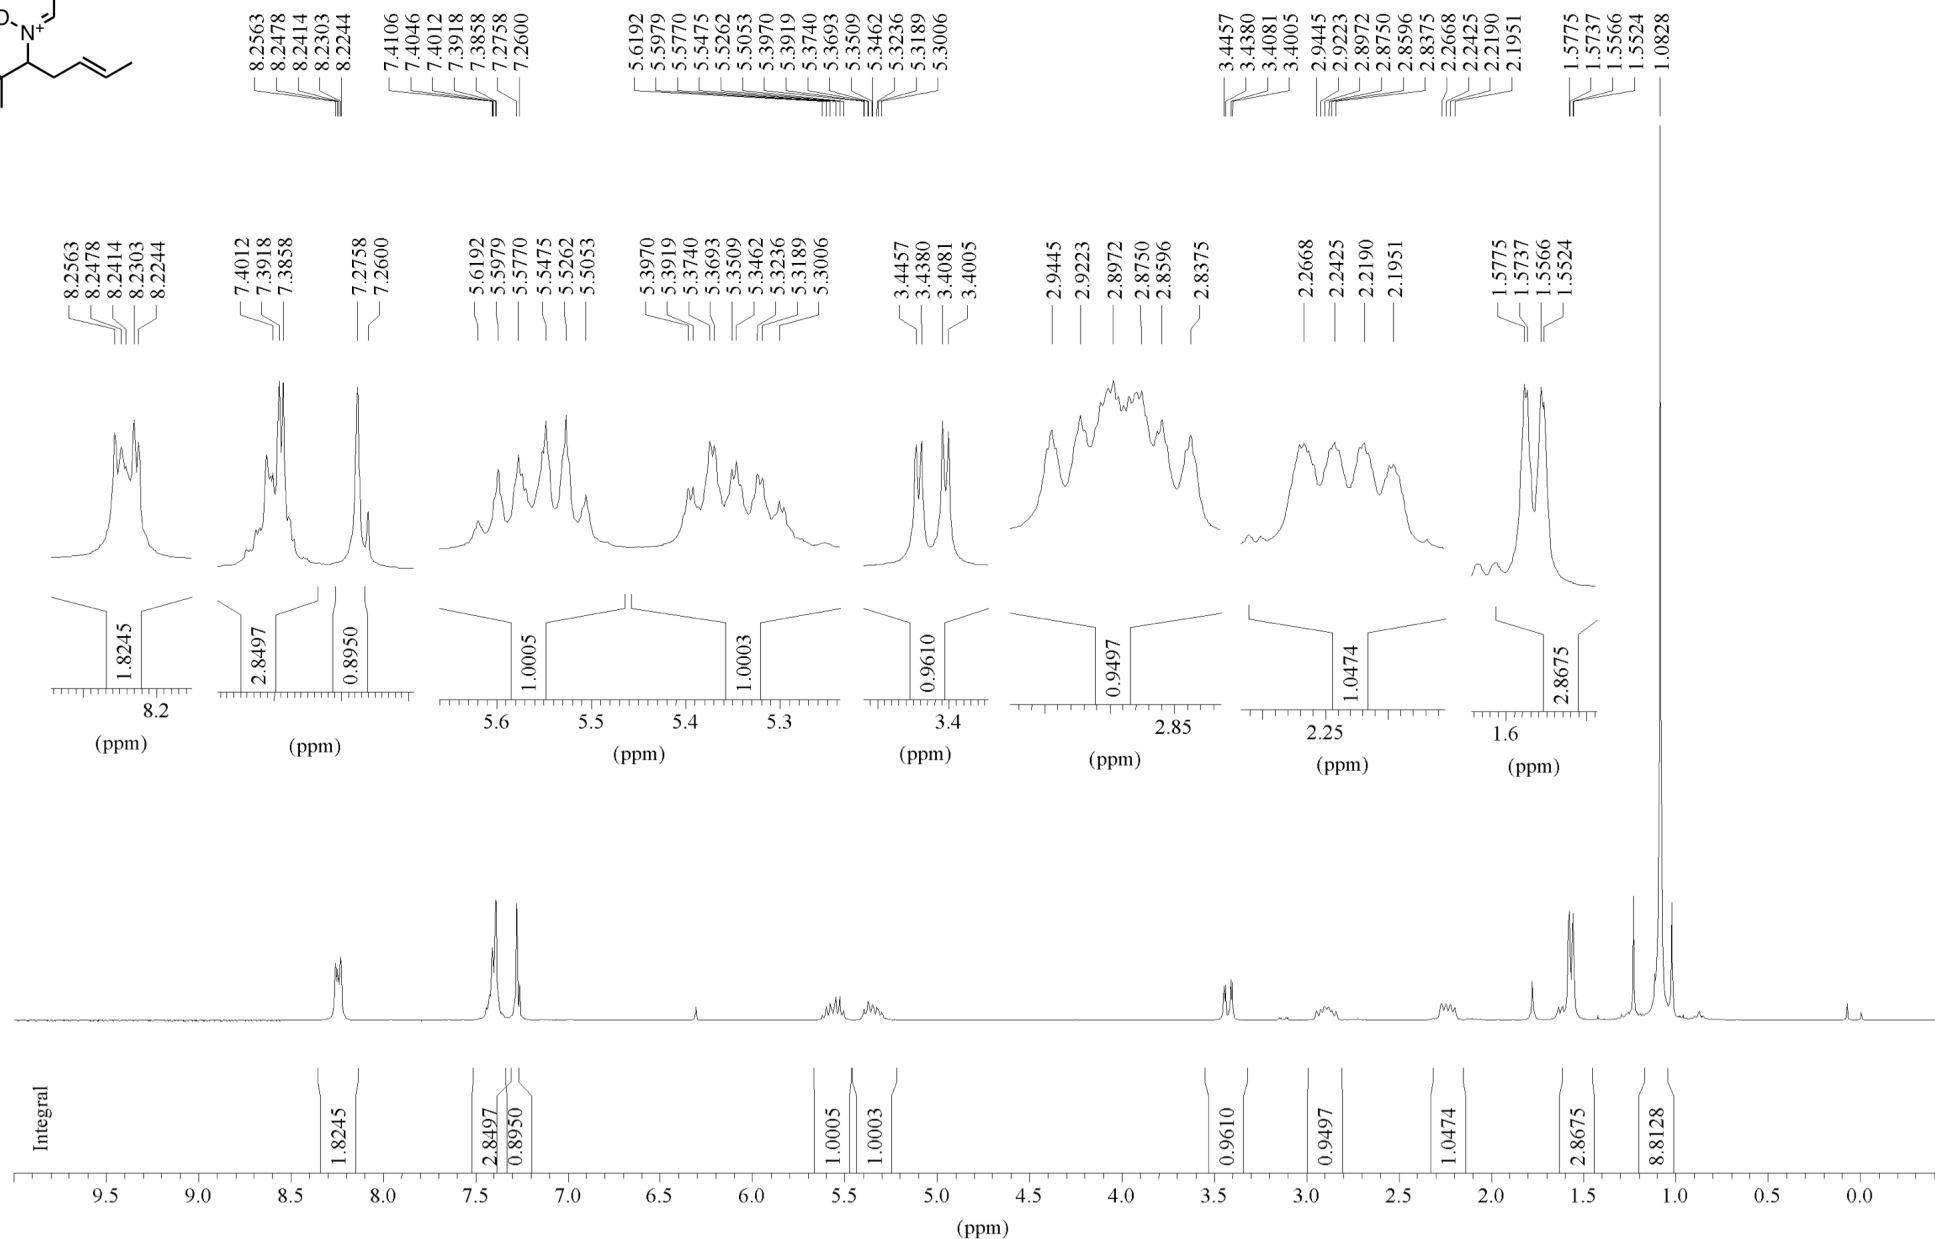

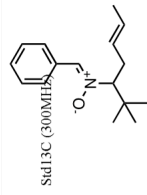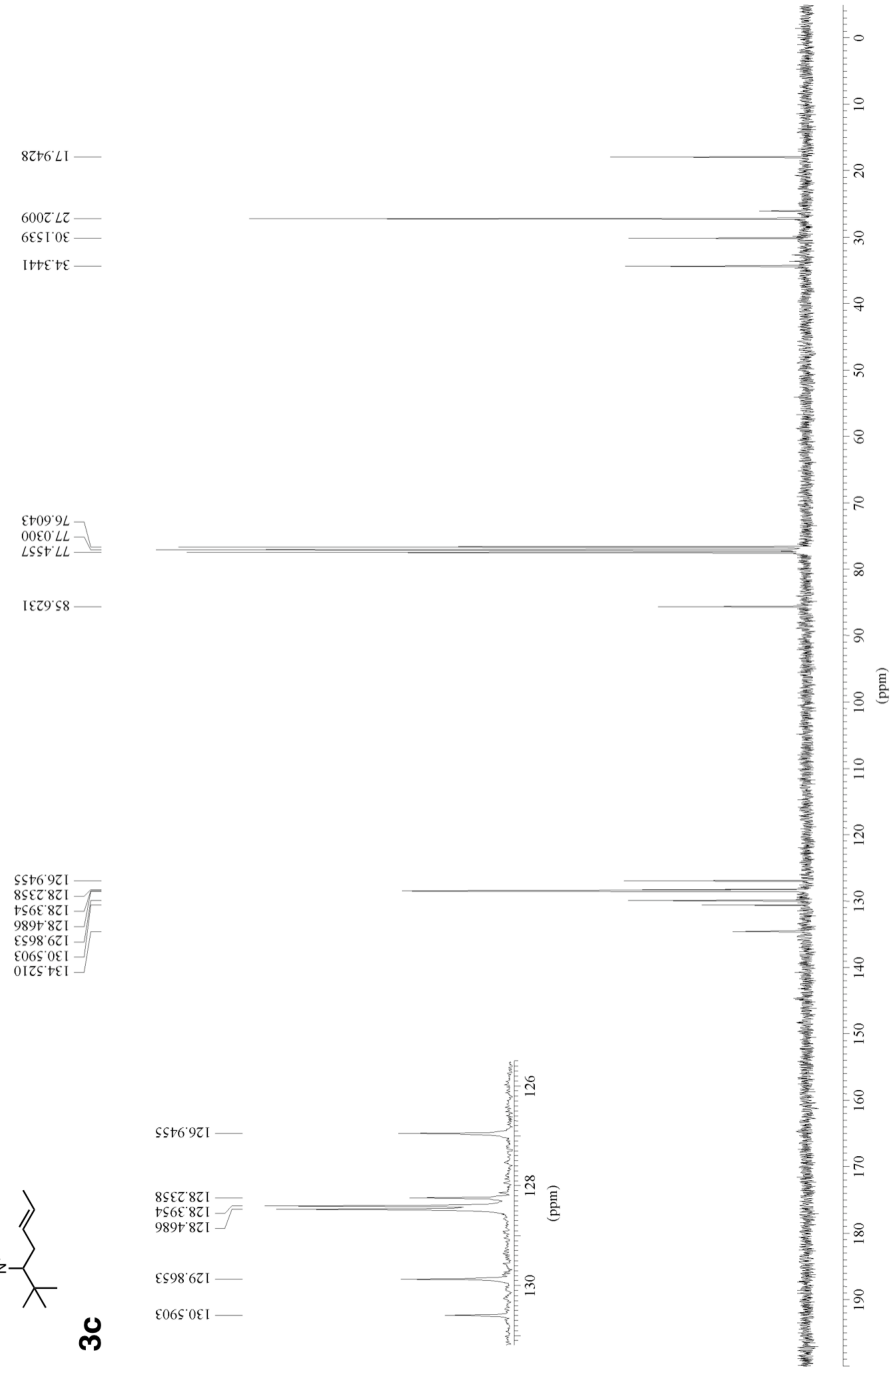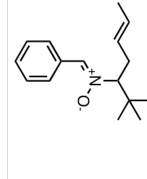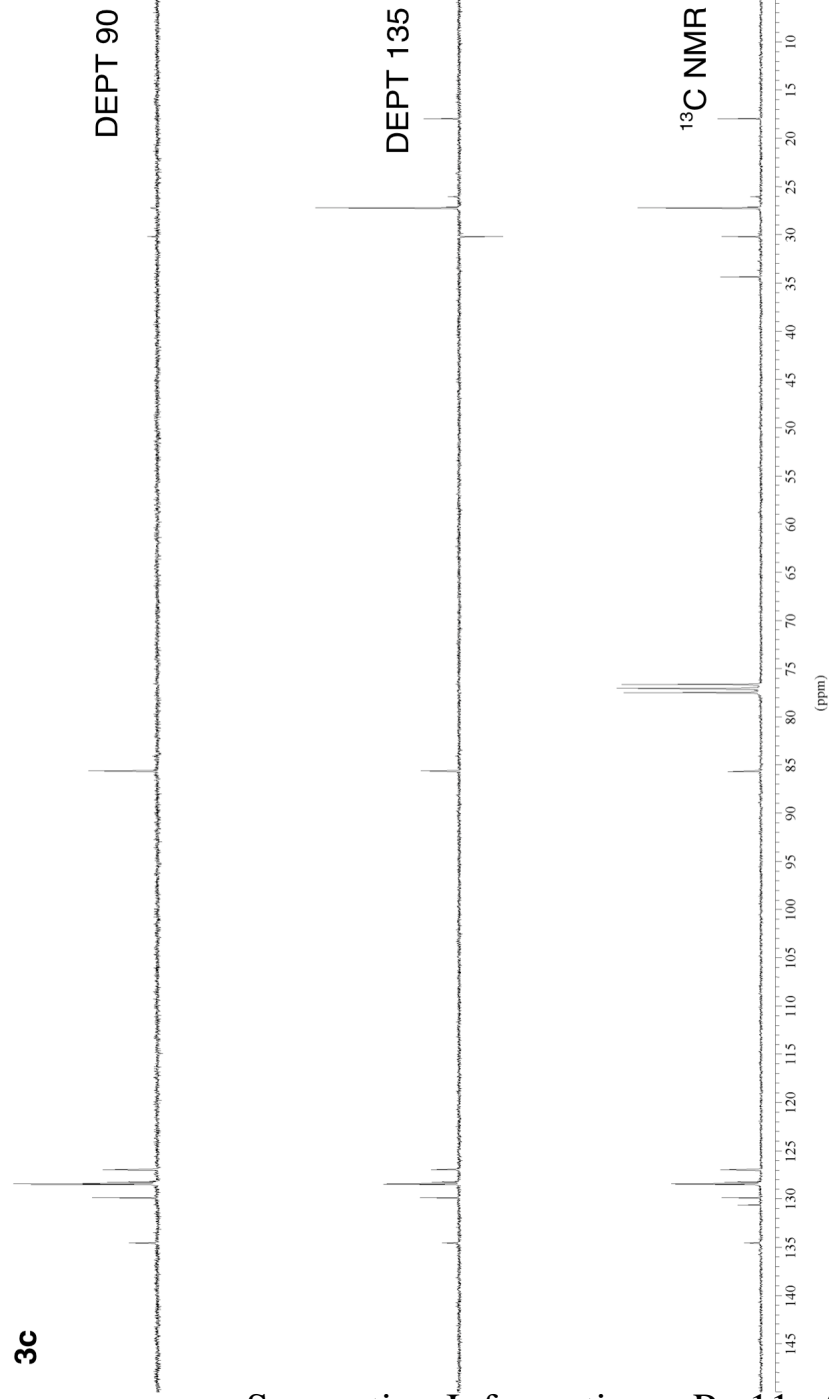

<sup>1</sup>H NMR (300MHz)

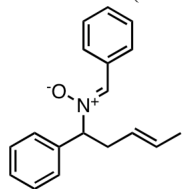

**3d**

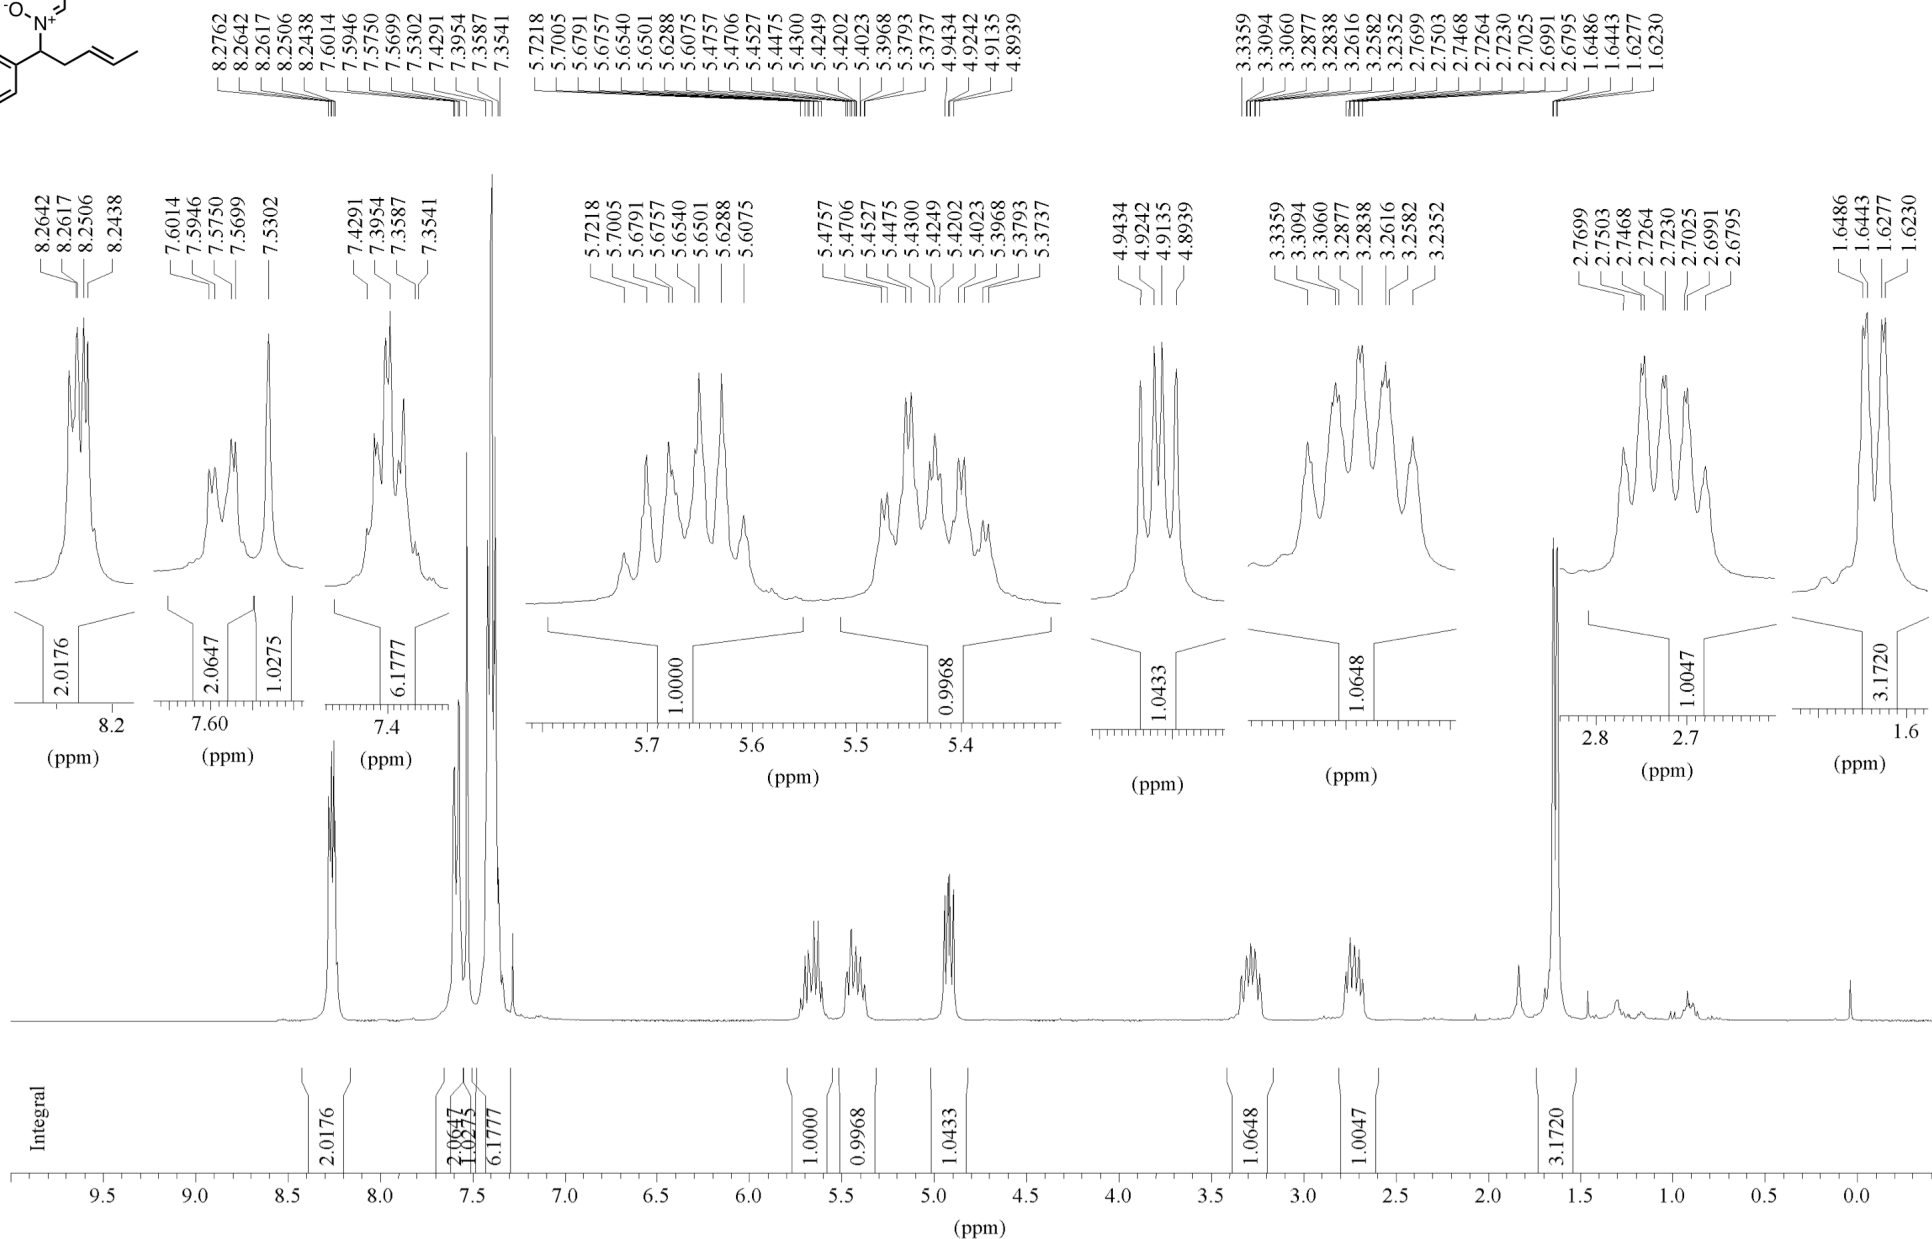

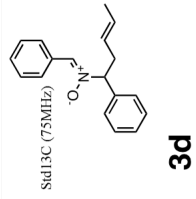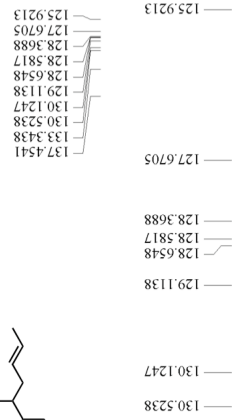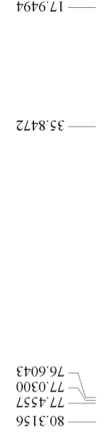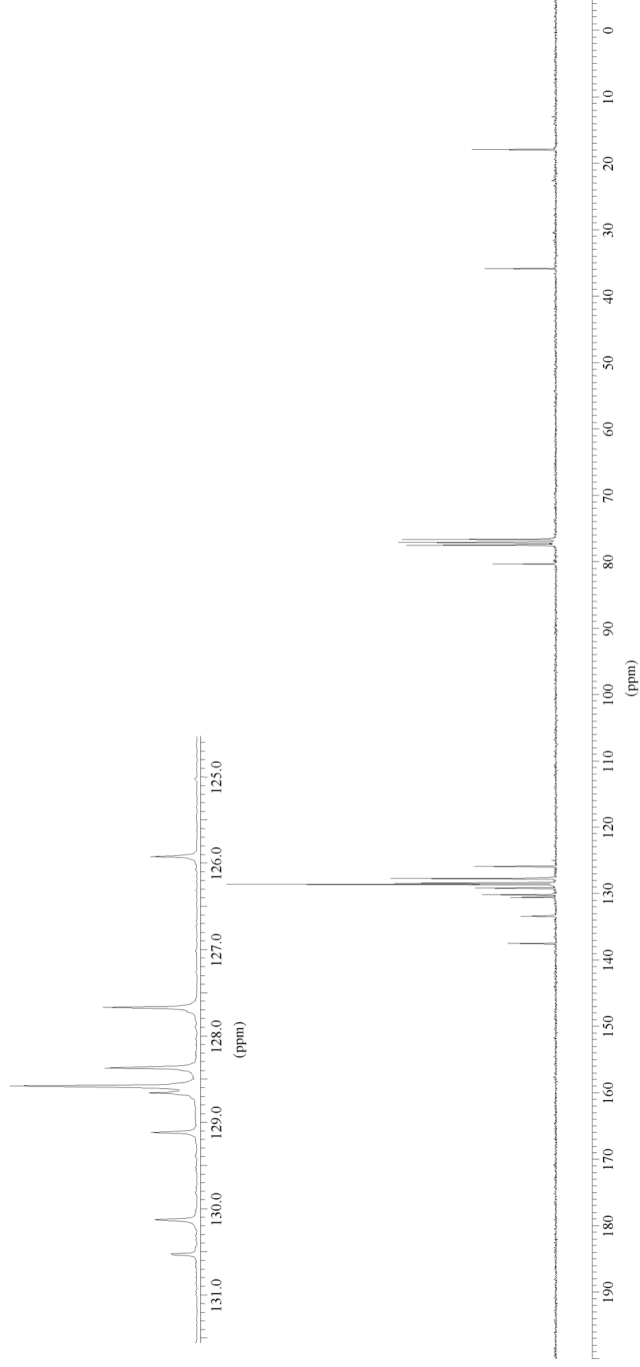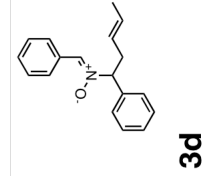

DEPT 90

DEPT 135

<sup>13</sup>C NMR

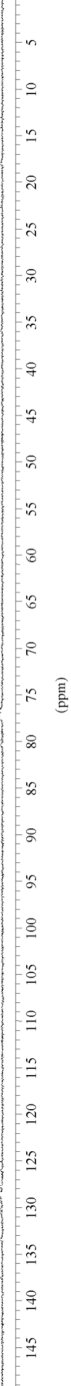

<sup>1</sup>H NMR (300MHz)

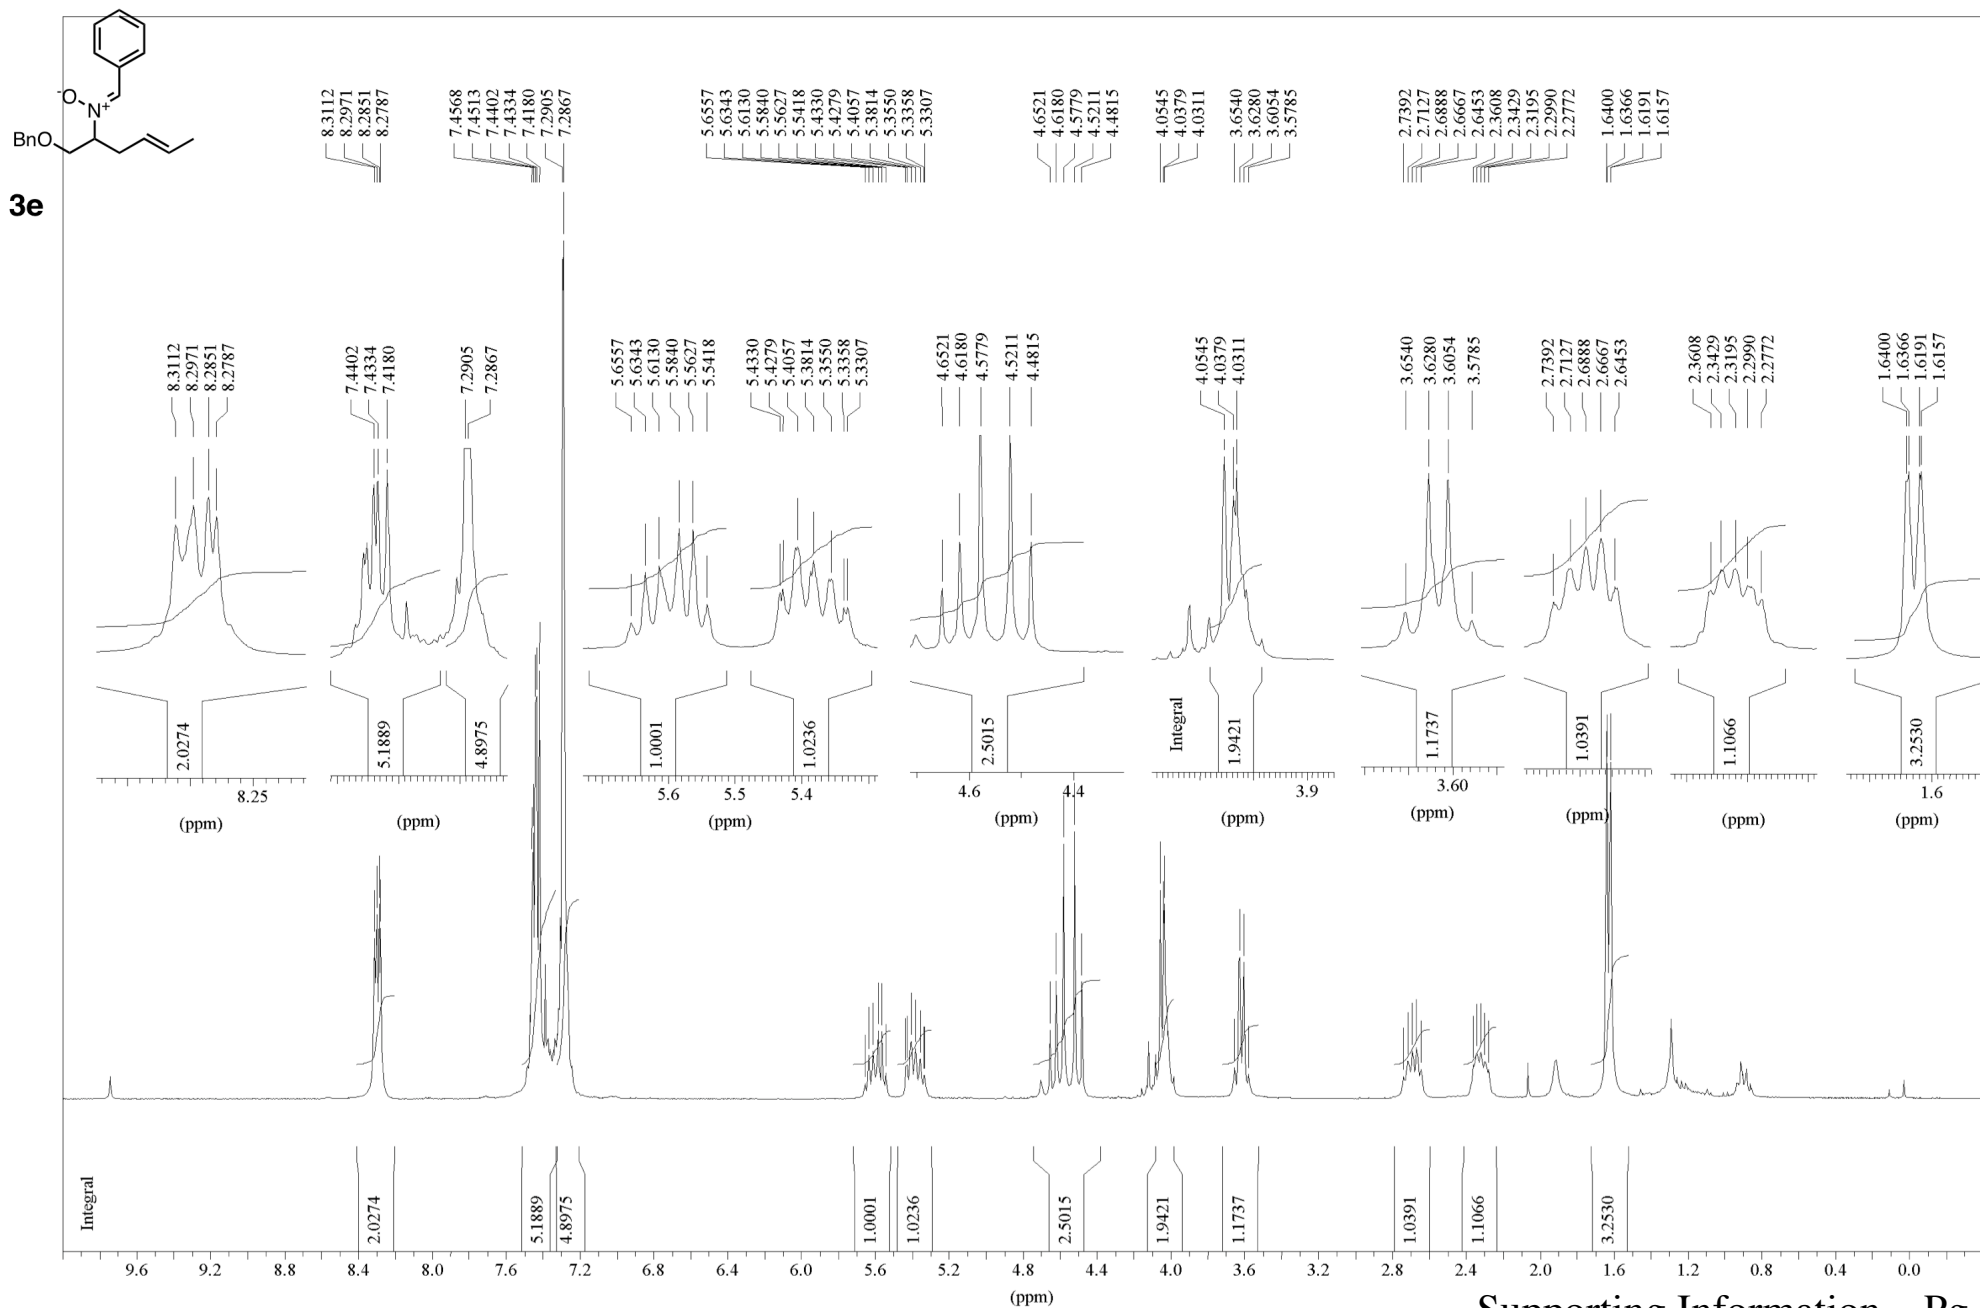

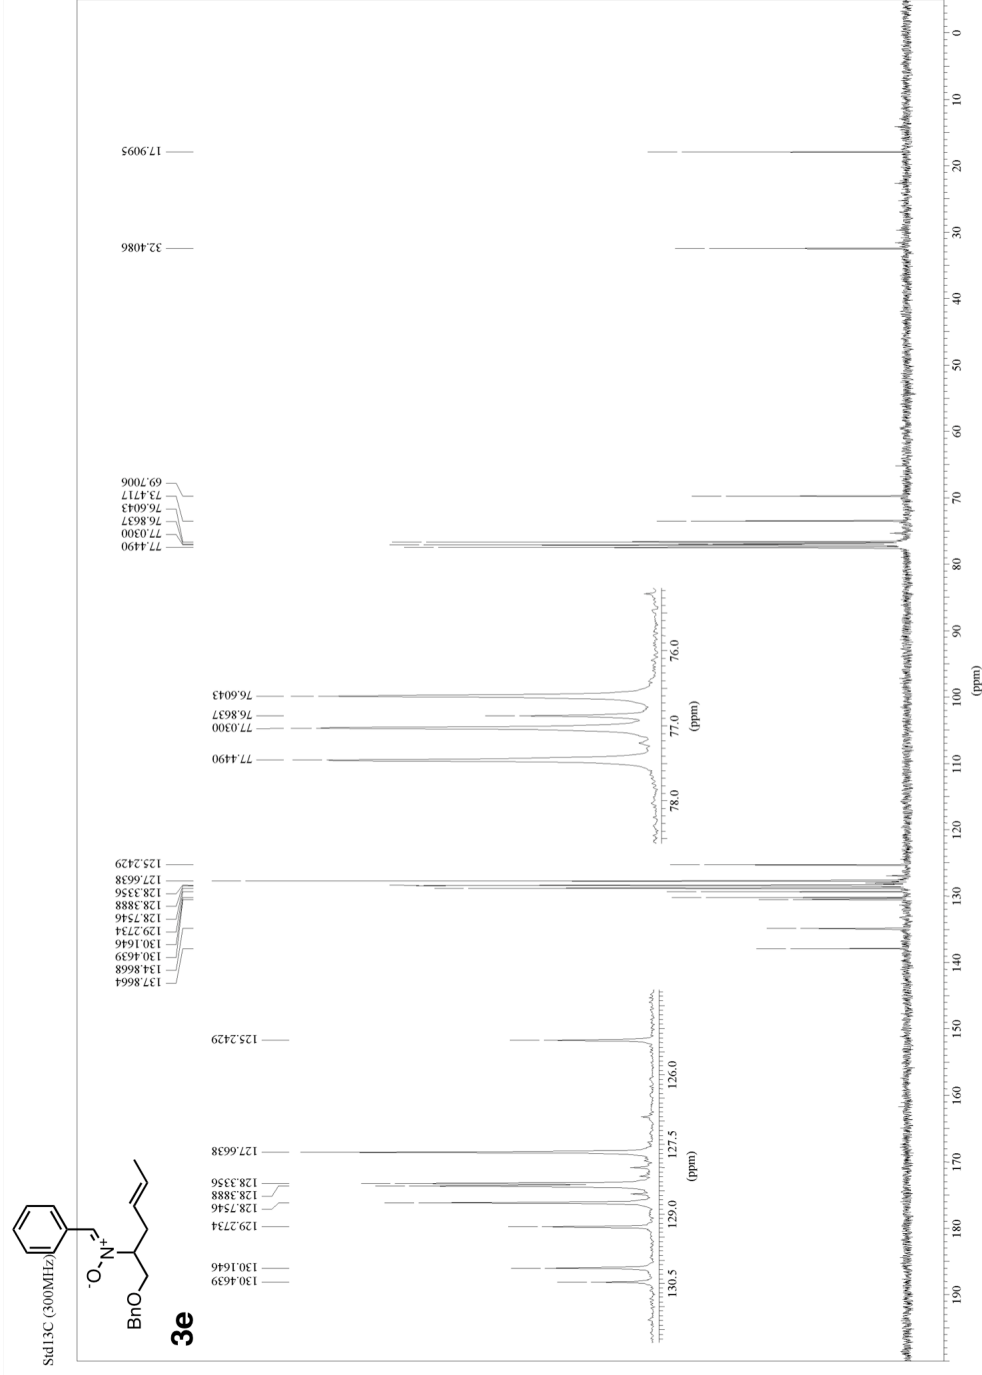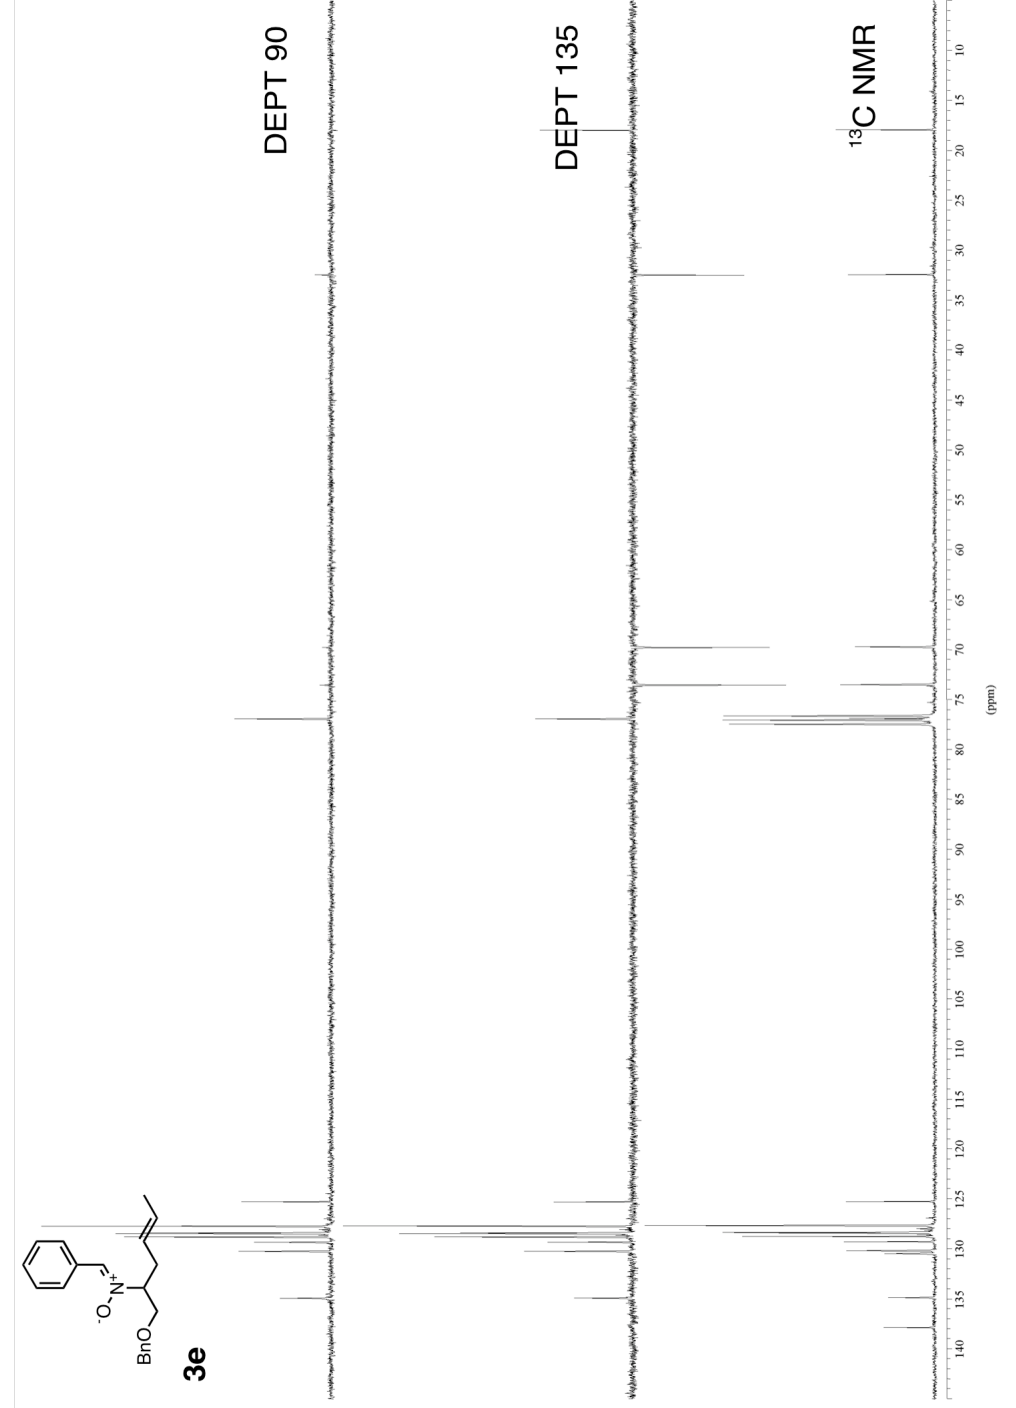

<sup>1</sup>H NMR (300MHz)

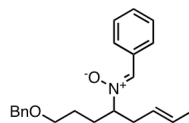

**3f**

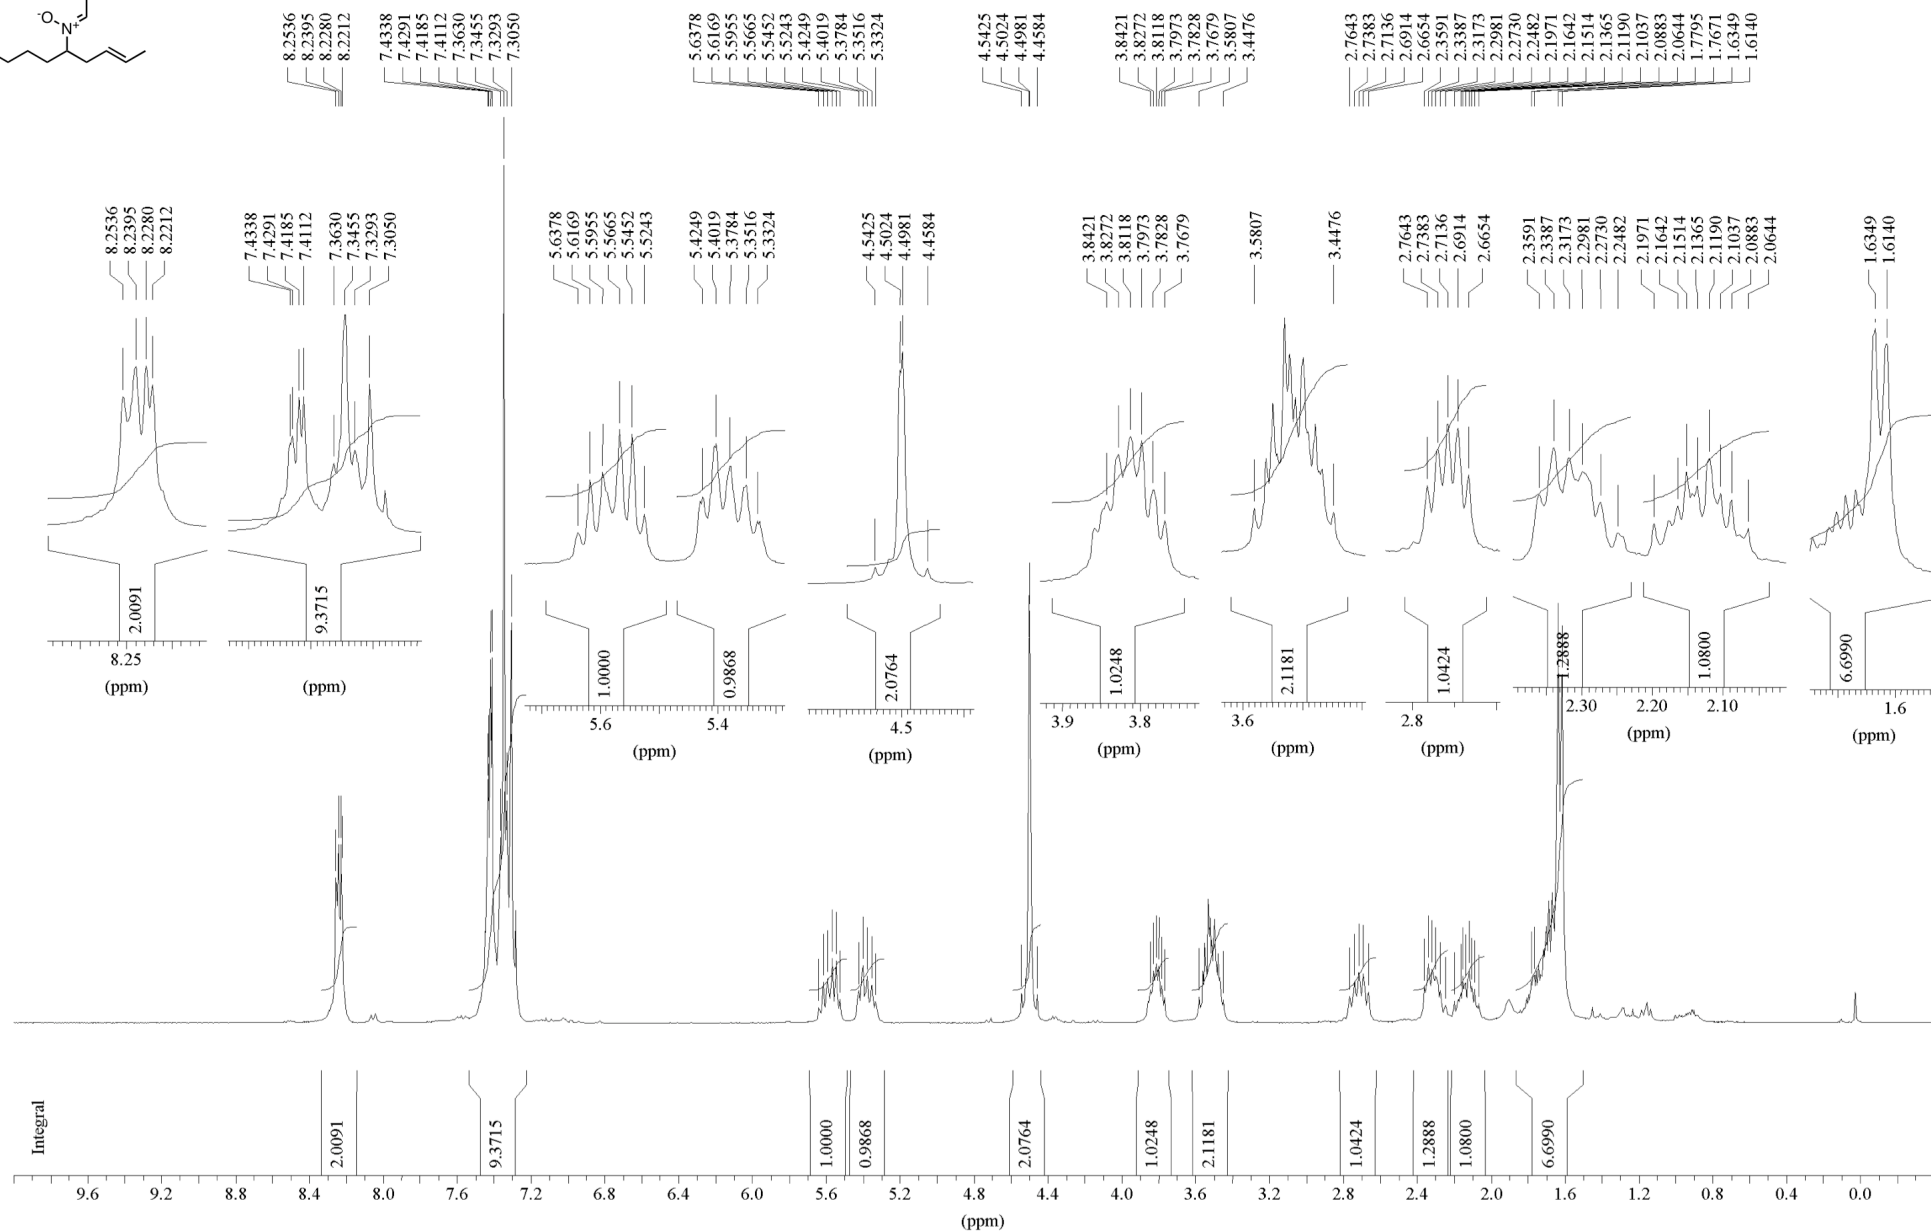



<sup>1</sup>H NMR (300MHz)

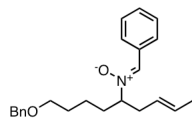

**3g**

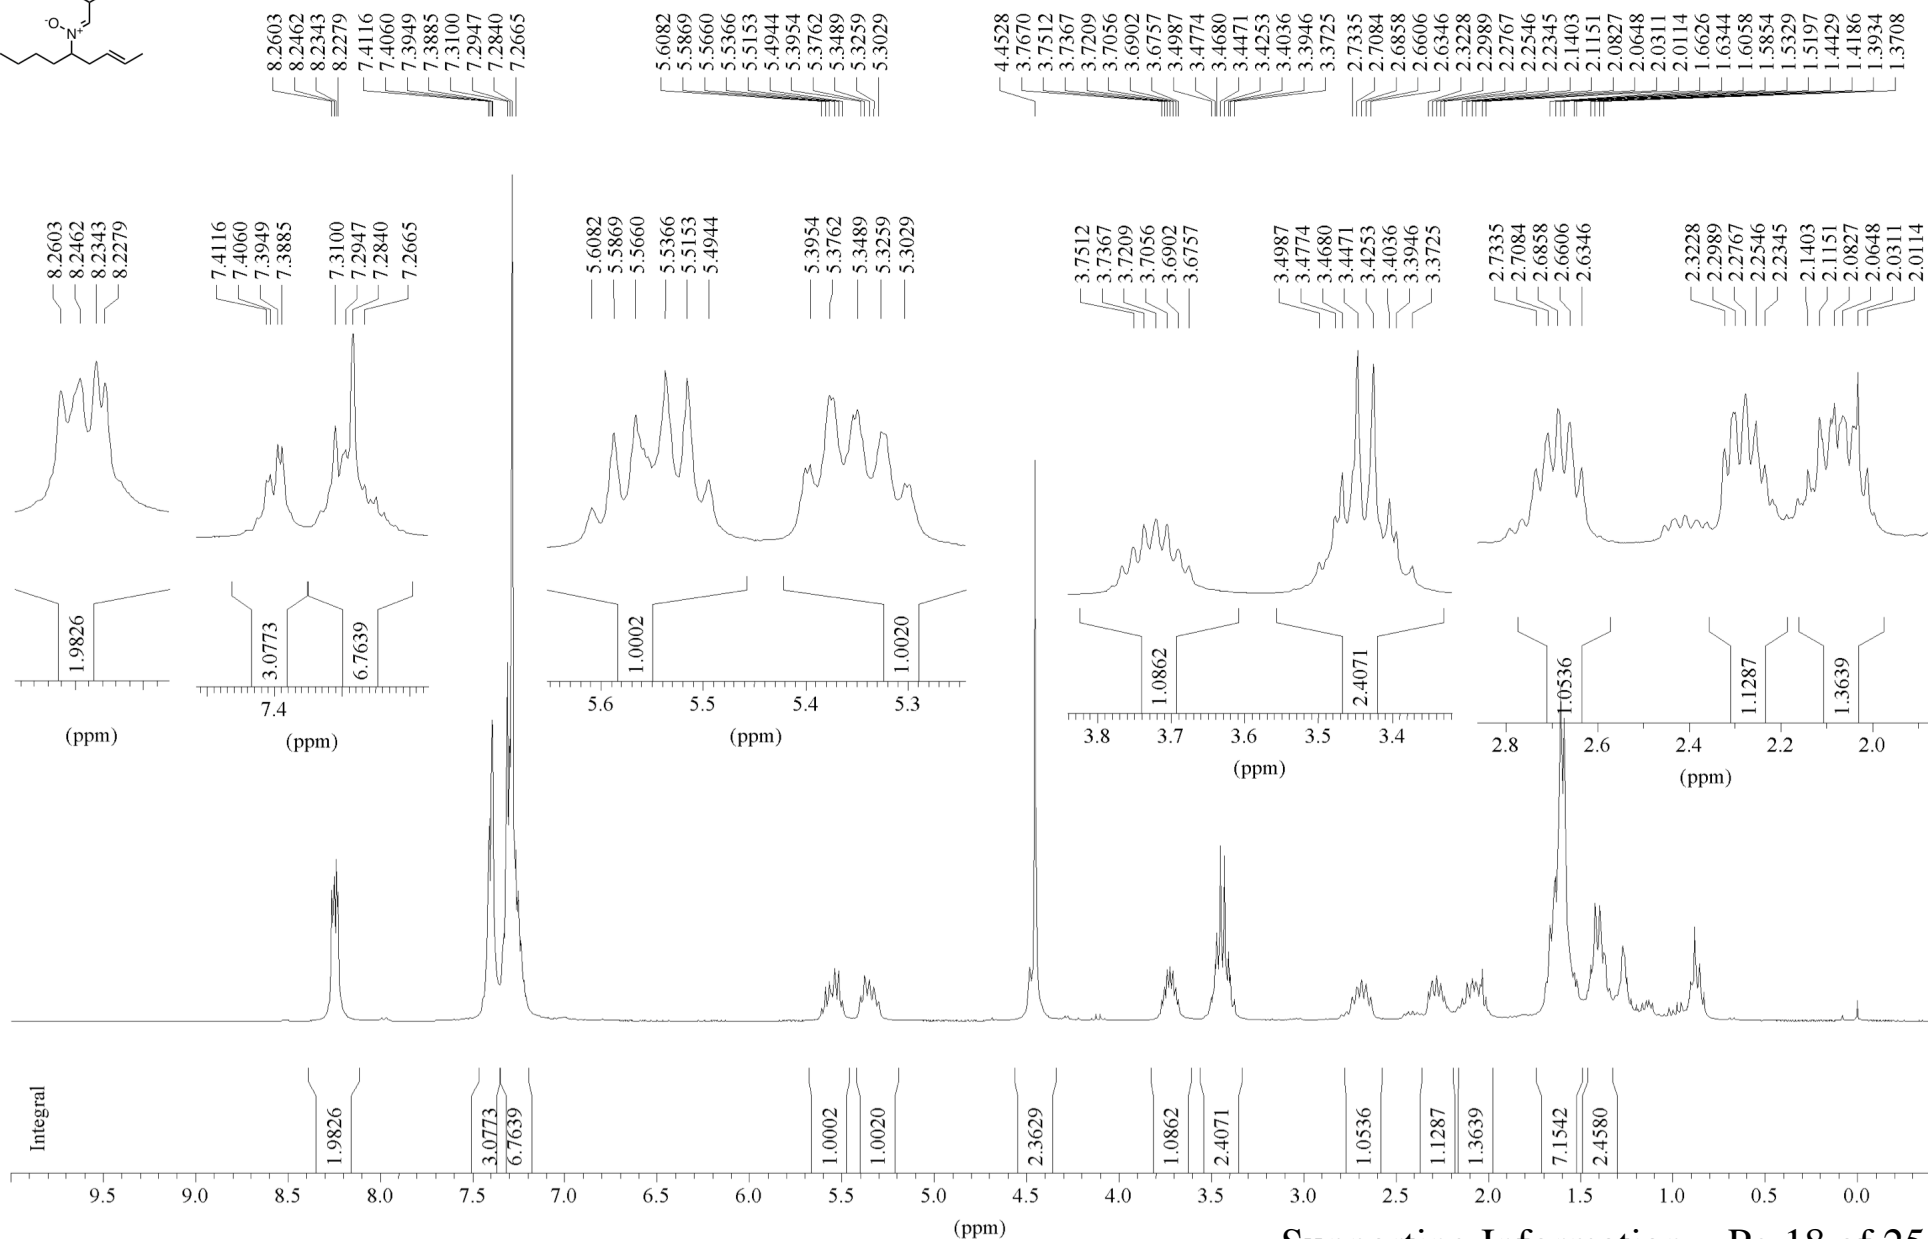

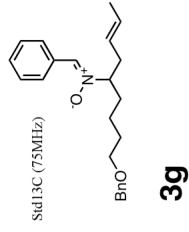

138.4584  
133.7761  
130.4107  
130.0249  
128.8145  
128.5684  
128.3821  
128.2624  
127.5508  
125.9945

130.4107  
130.0249  
128.8145  
128.5684  
128.3821  
128.2624  
127.5508  
127.4311  
125.9945

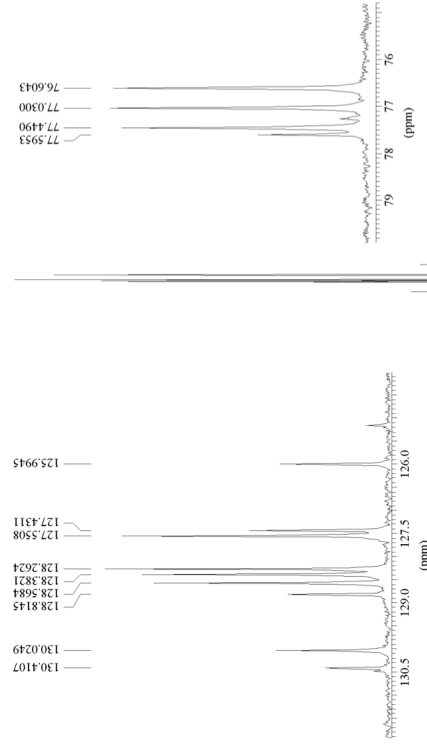

36.2995  
31.9963  
29.3359  
22.8512  
17.8896

77.5953  
77.4490  
77.0300  
76.6043  
72.7933  
69.9135

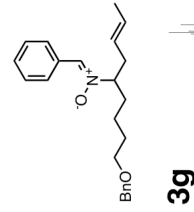

DEPT 90

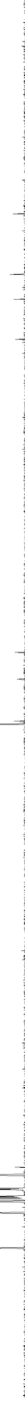

DEPT 135

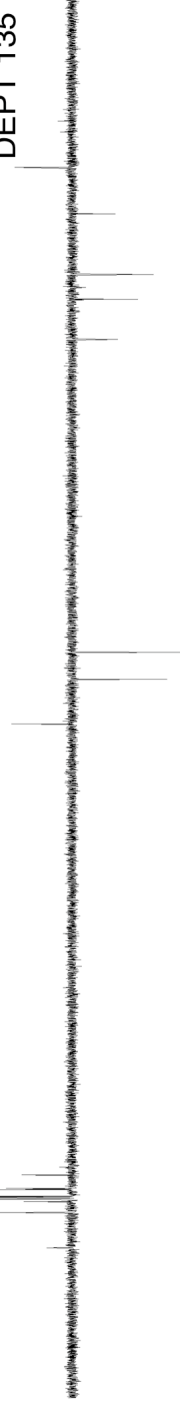

<sup>13</sup>C NMR

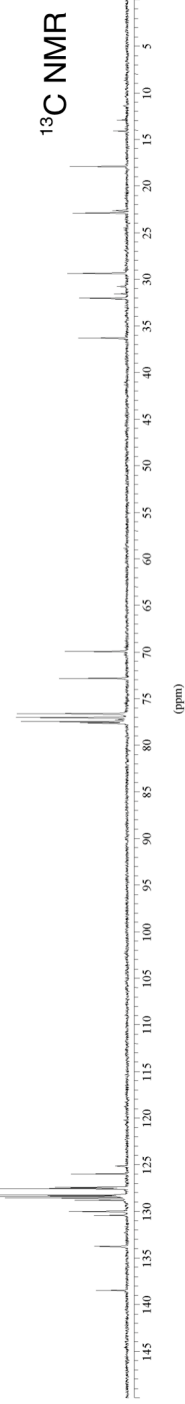

<sup>1</sup>H (400MHz)

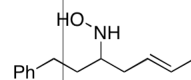

5

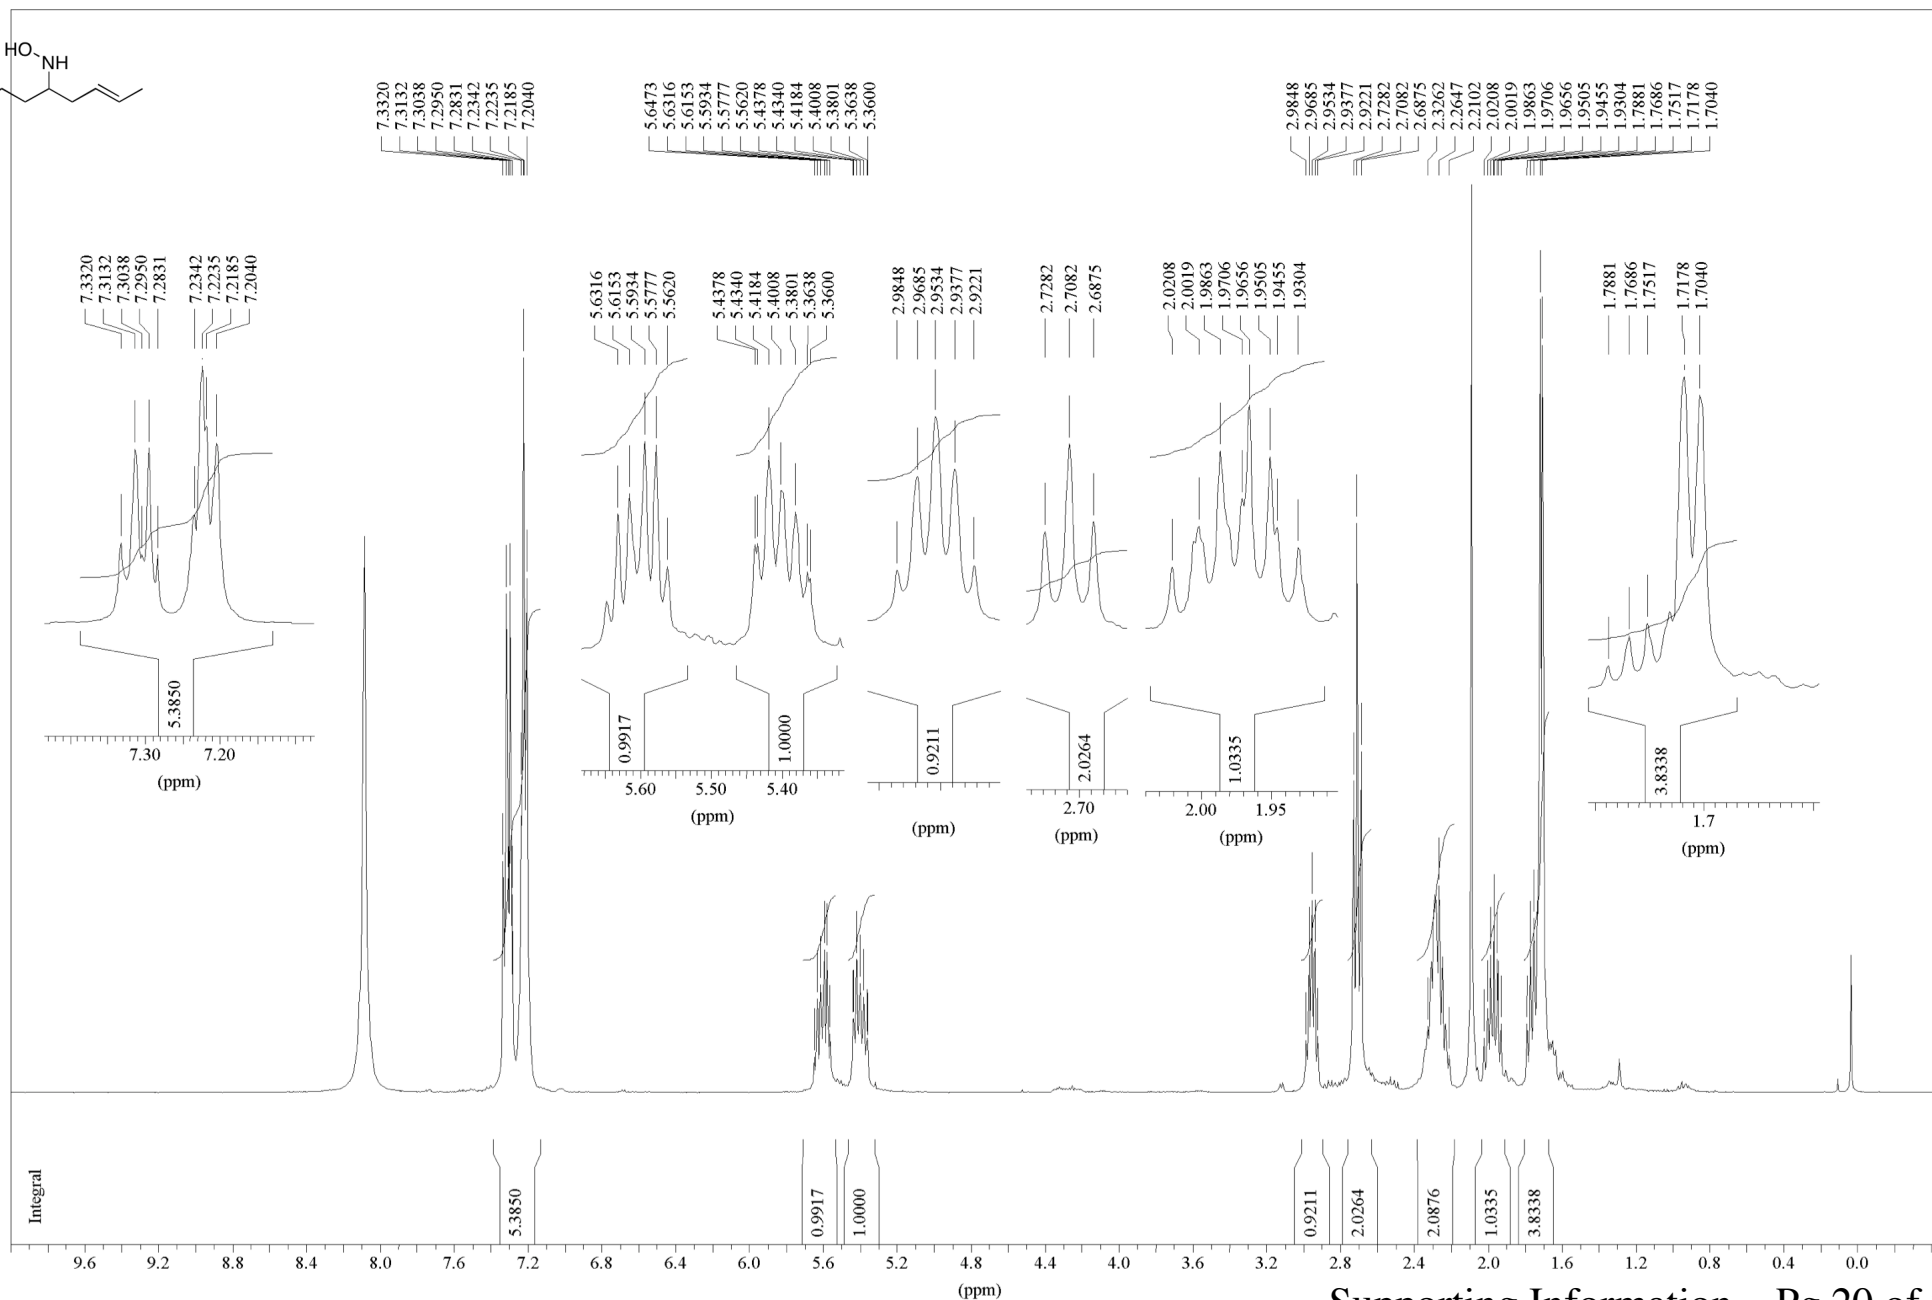

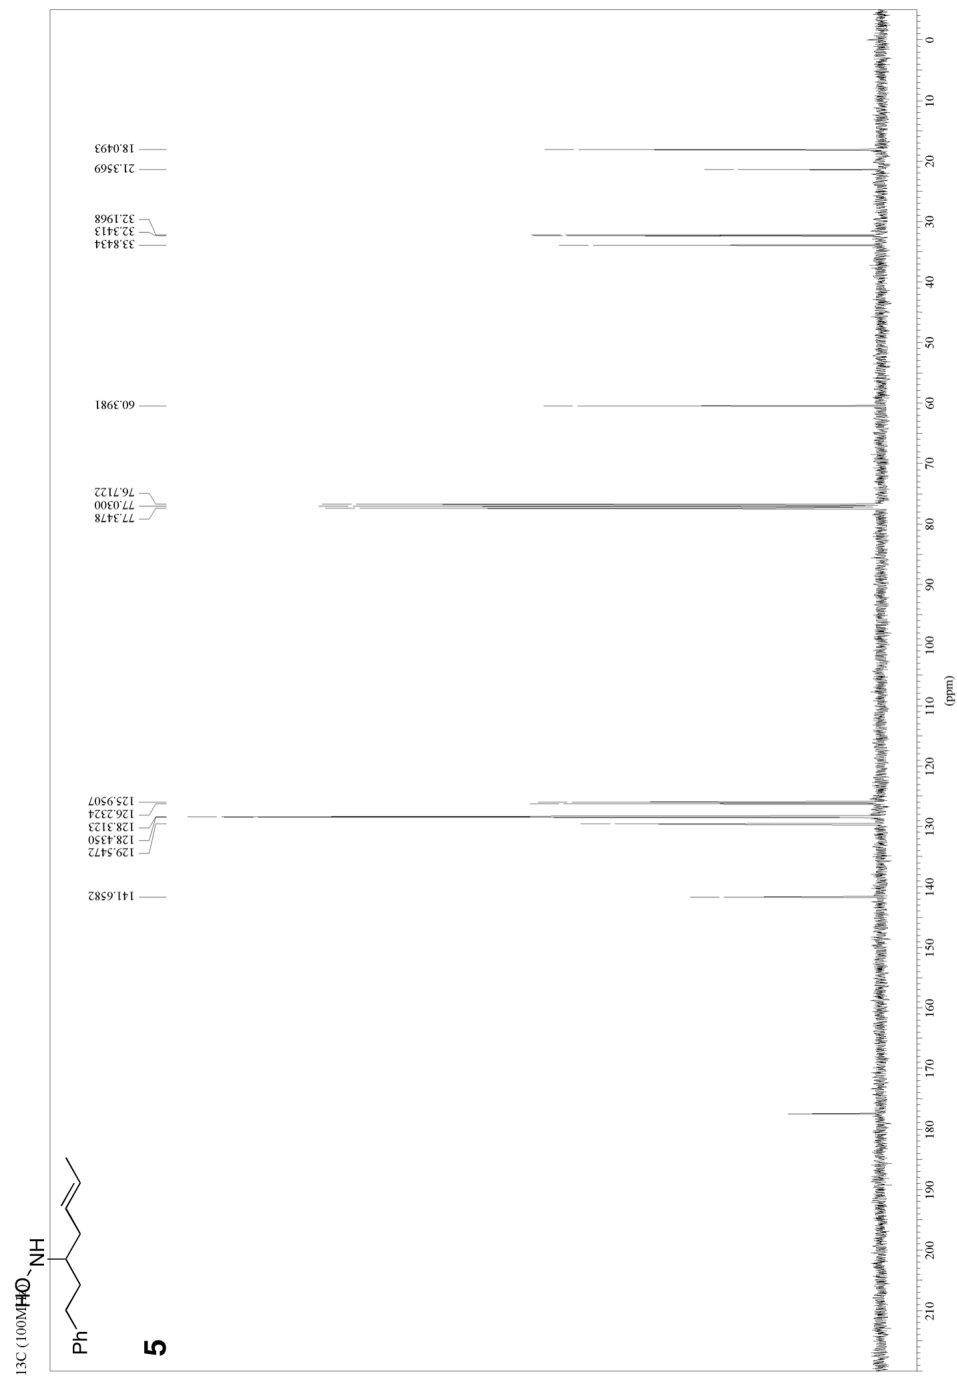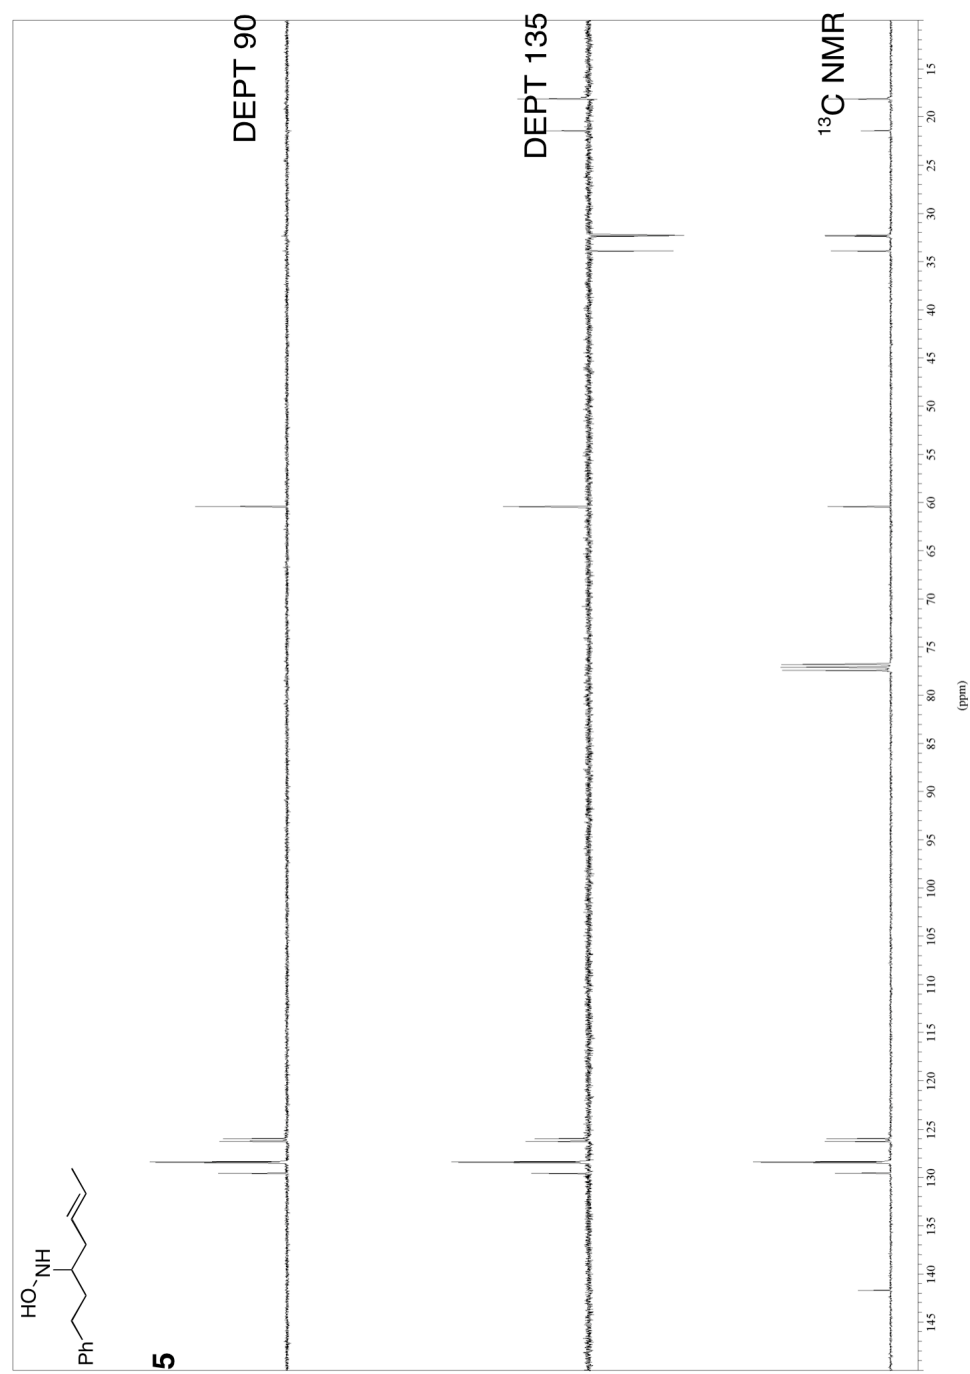

<sup>1</sup>H (400MHz)

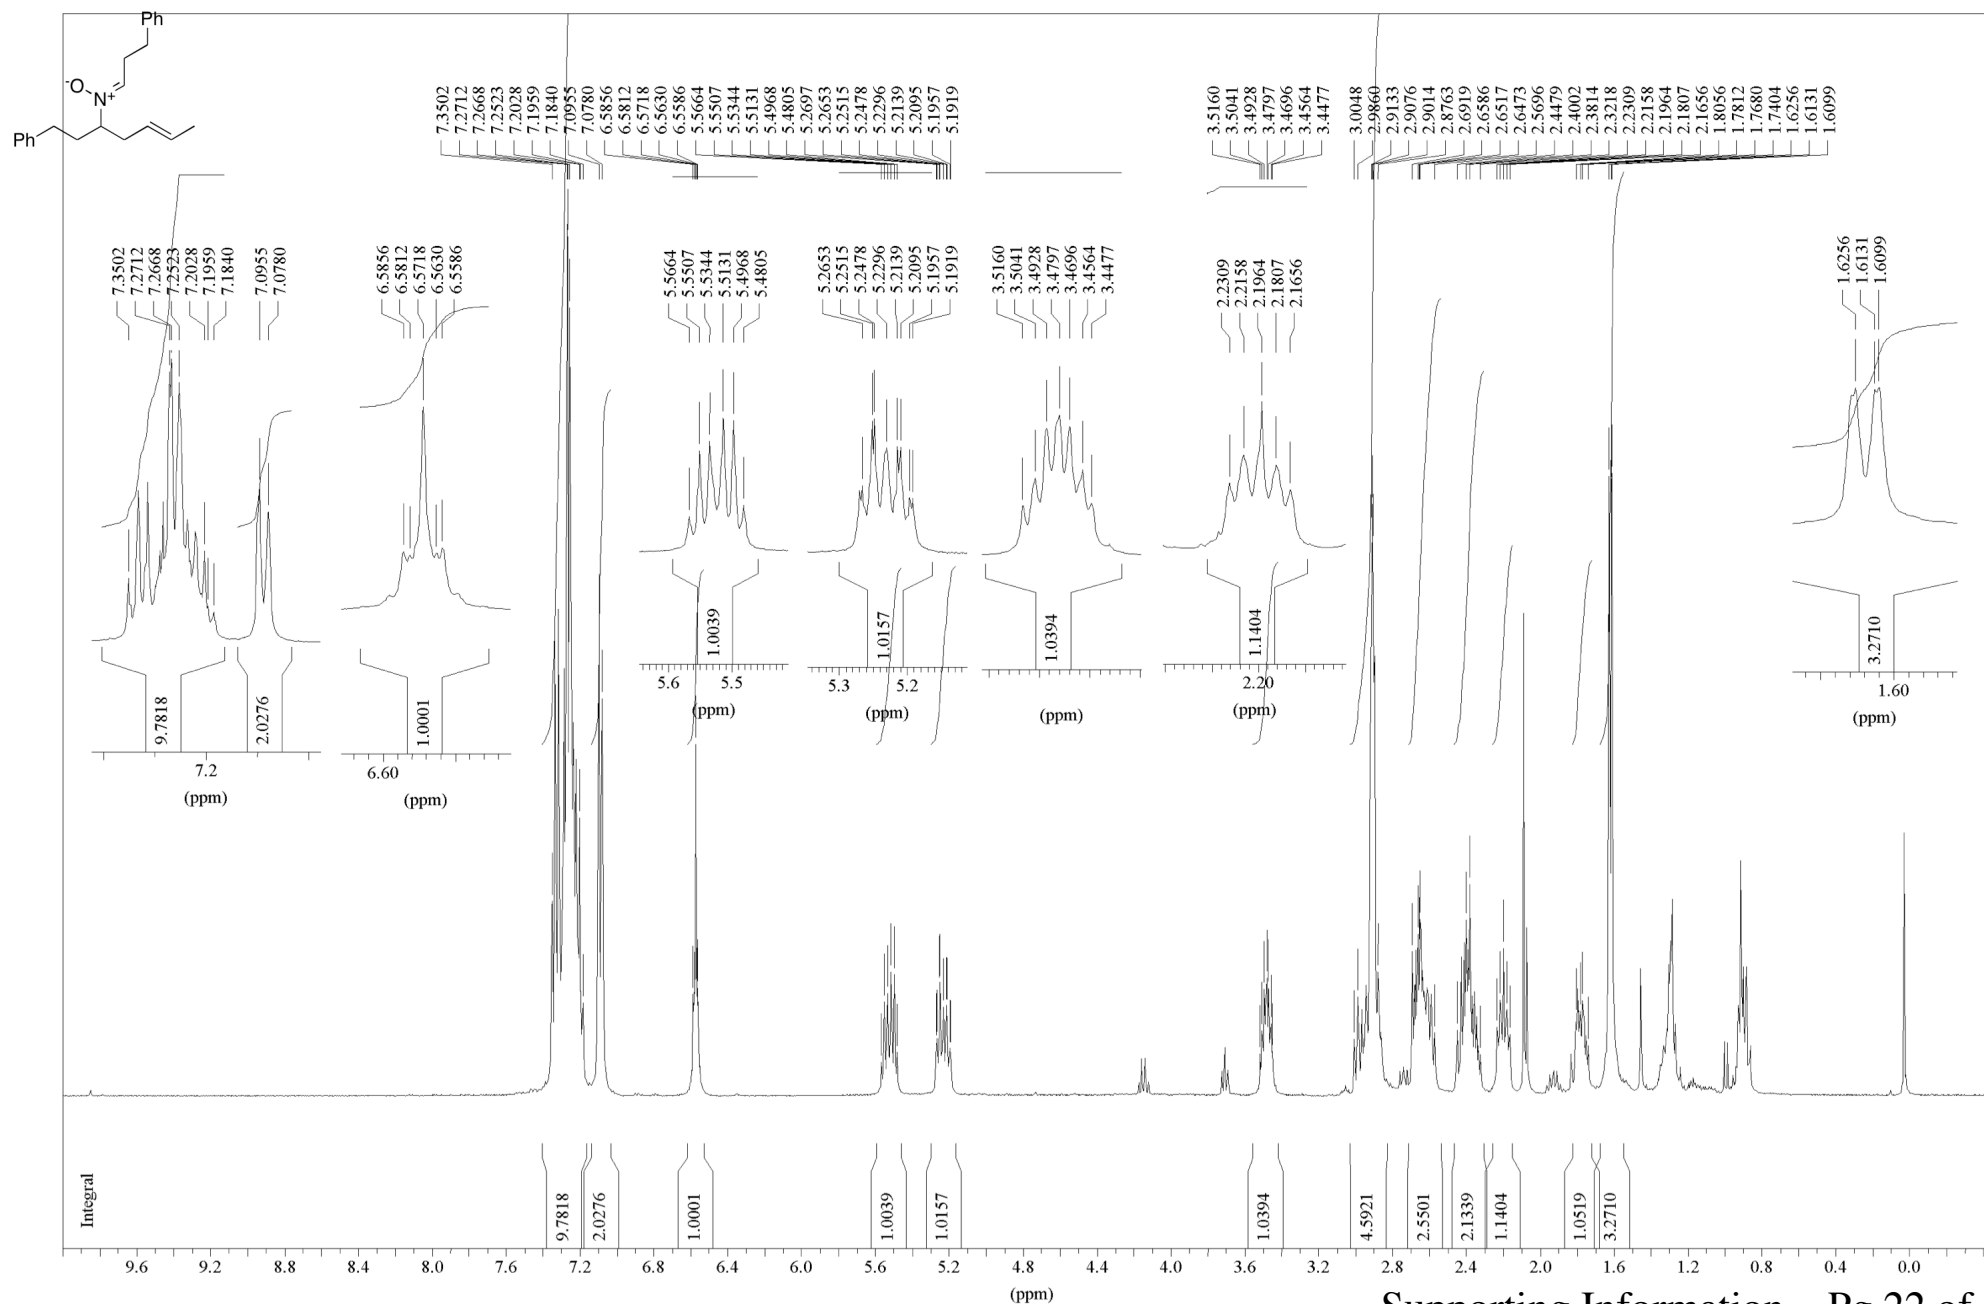

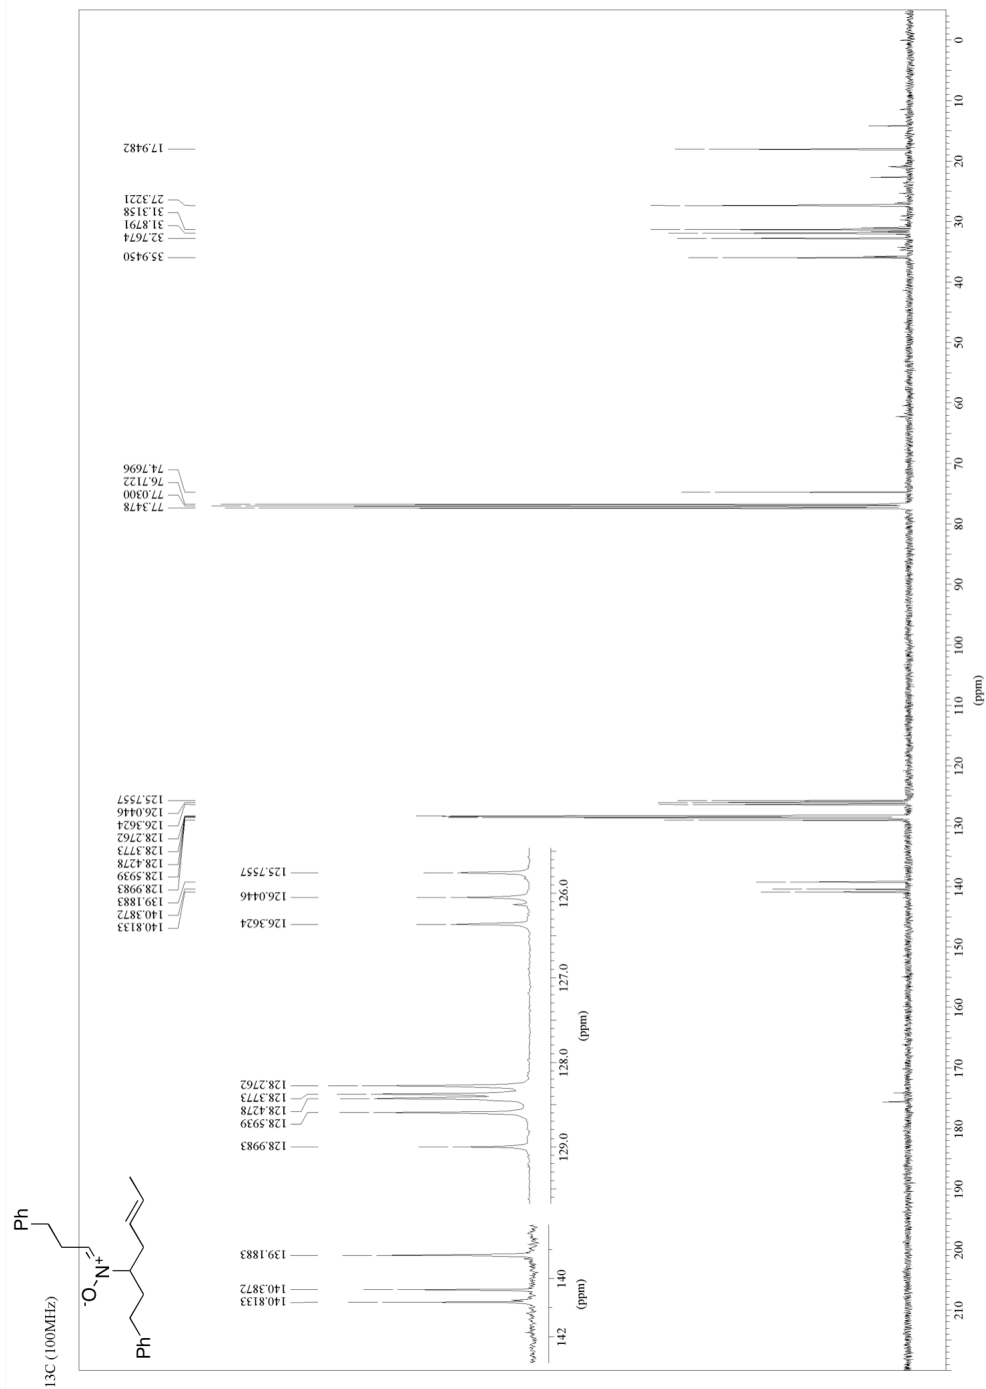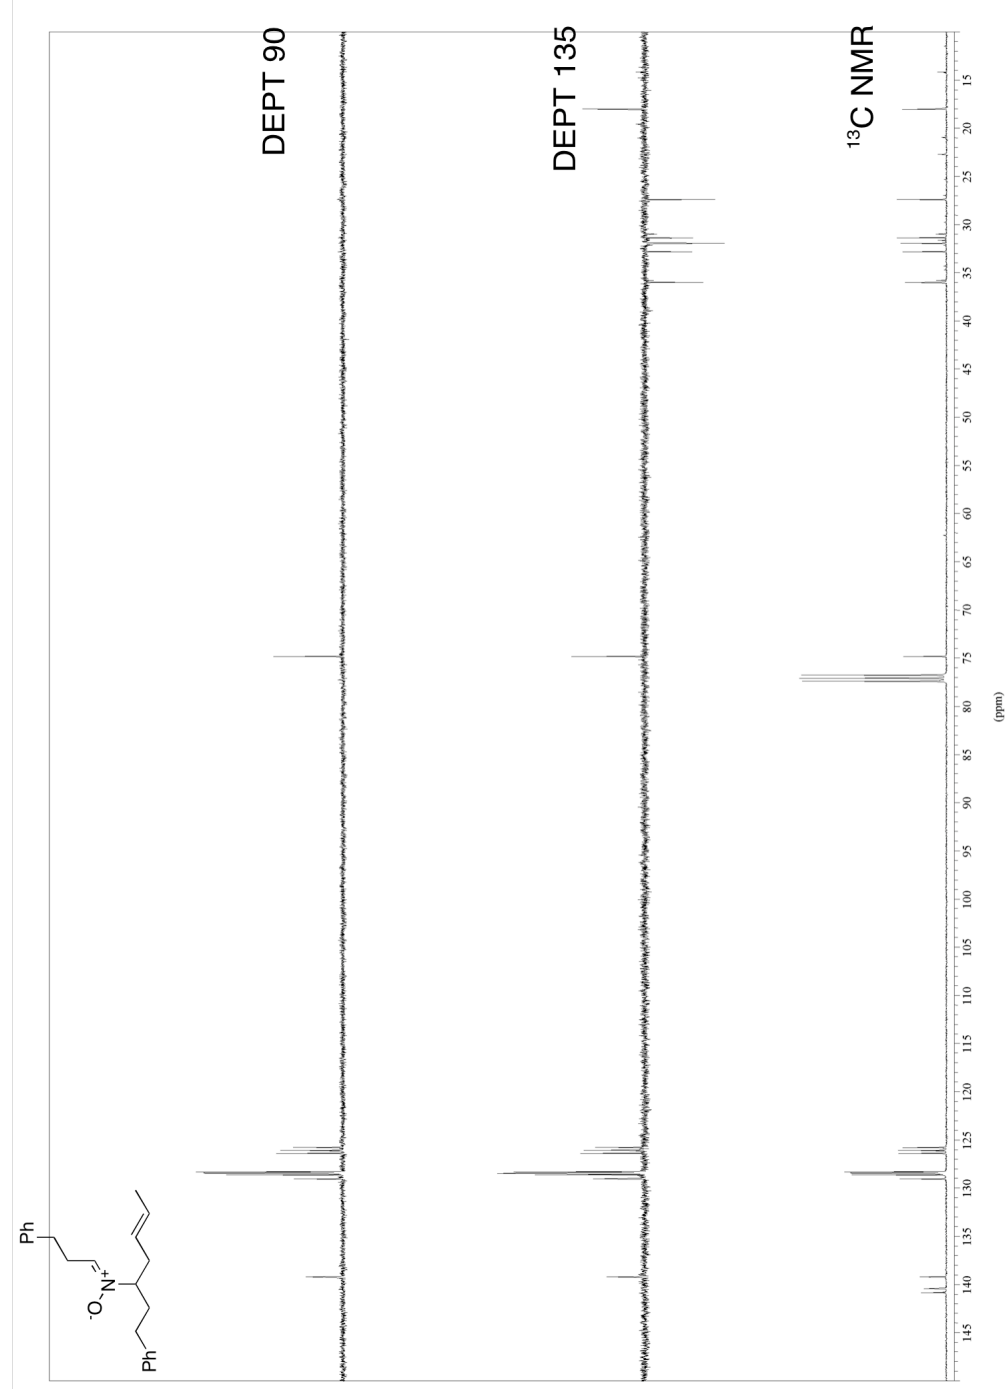

<sup>1</sup>H (400MHz)

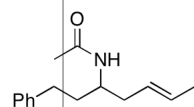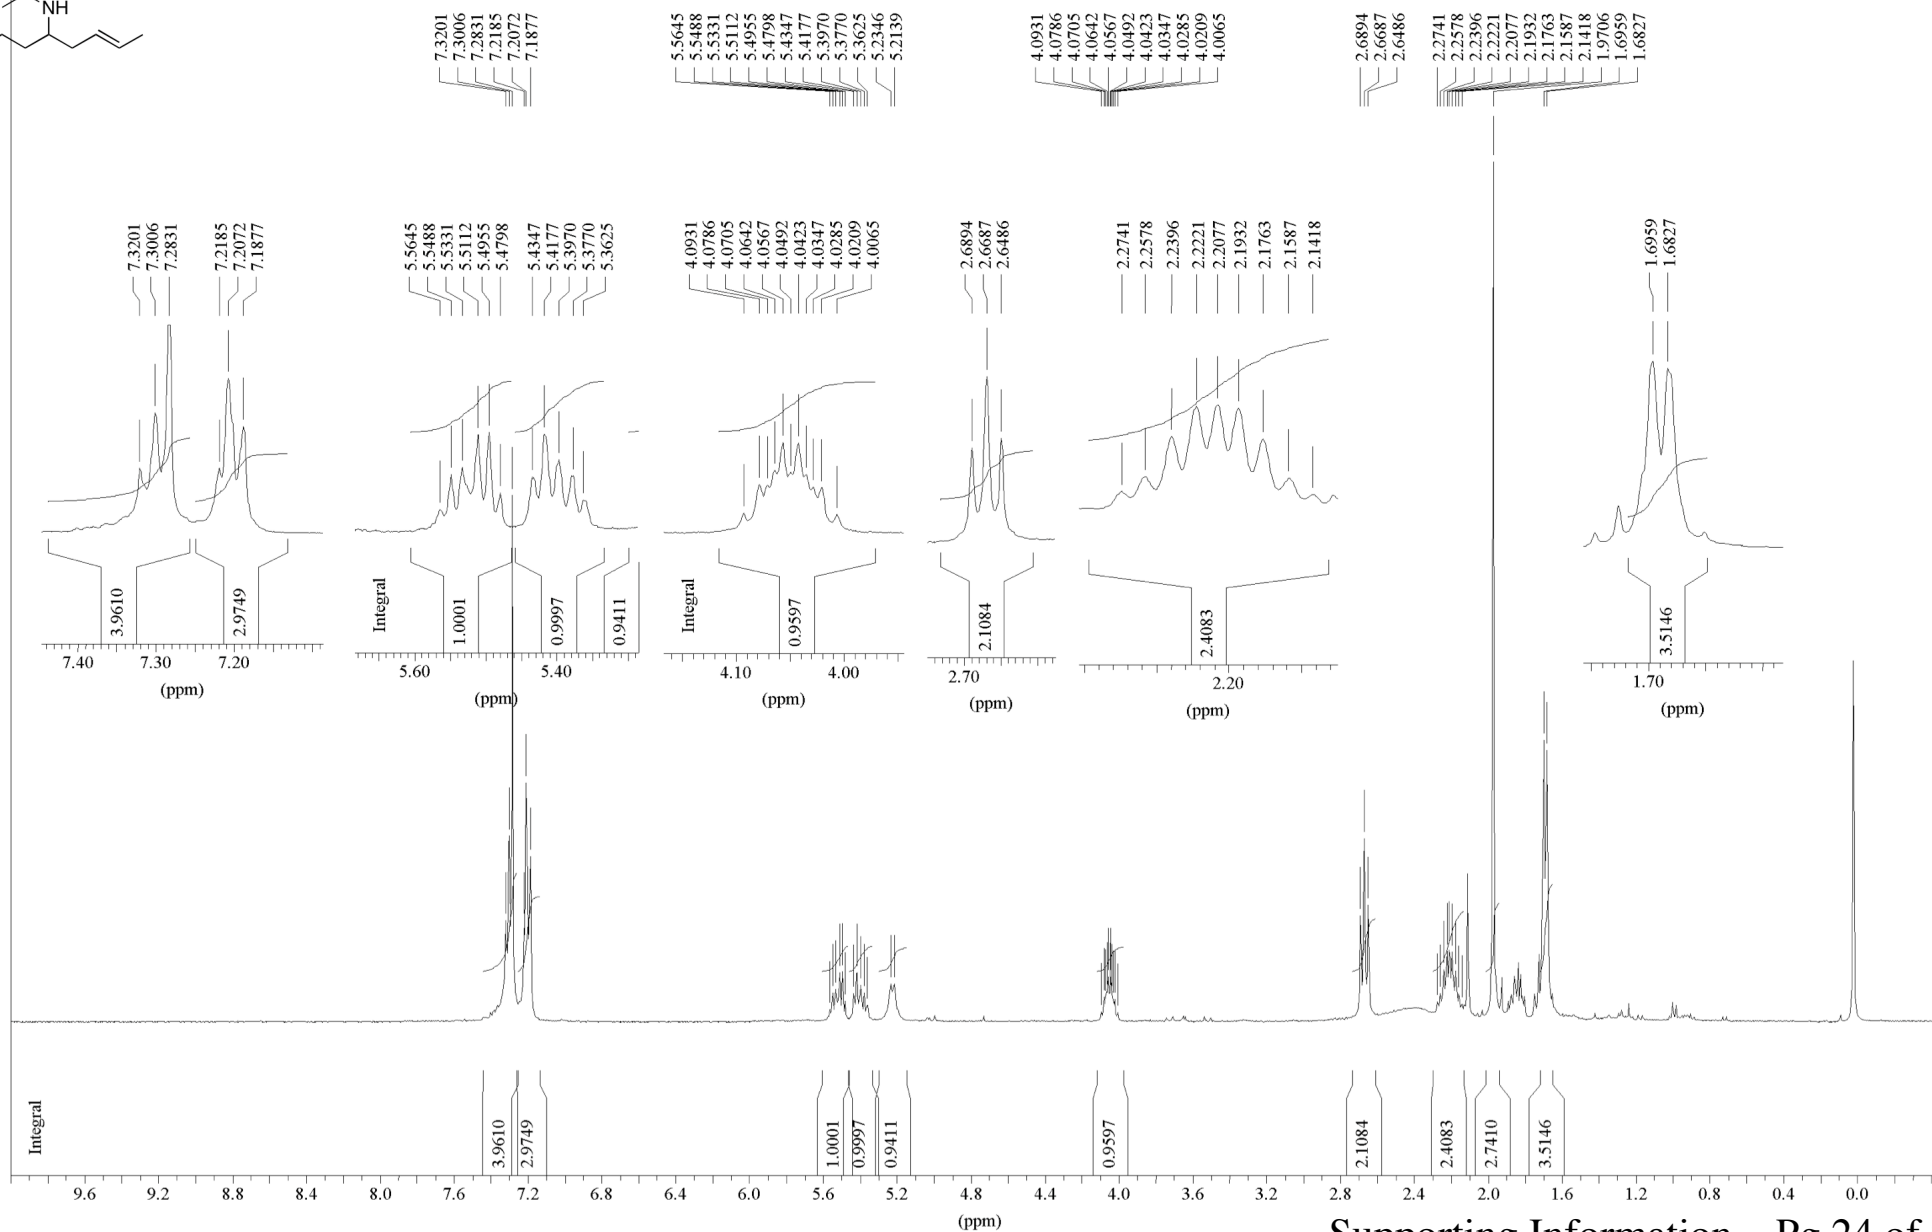

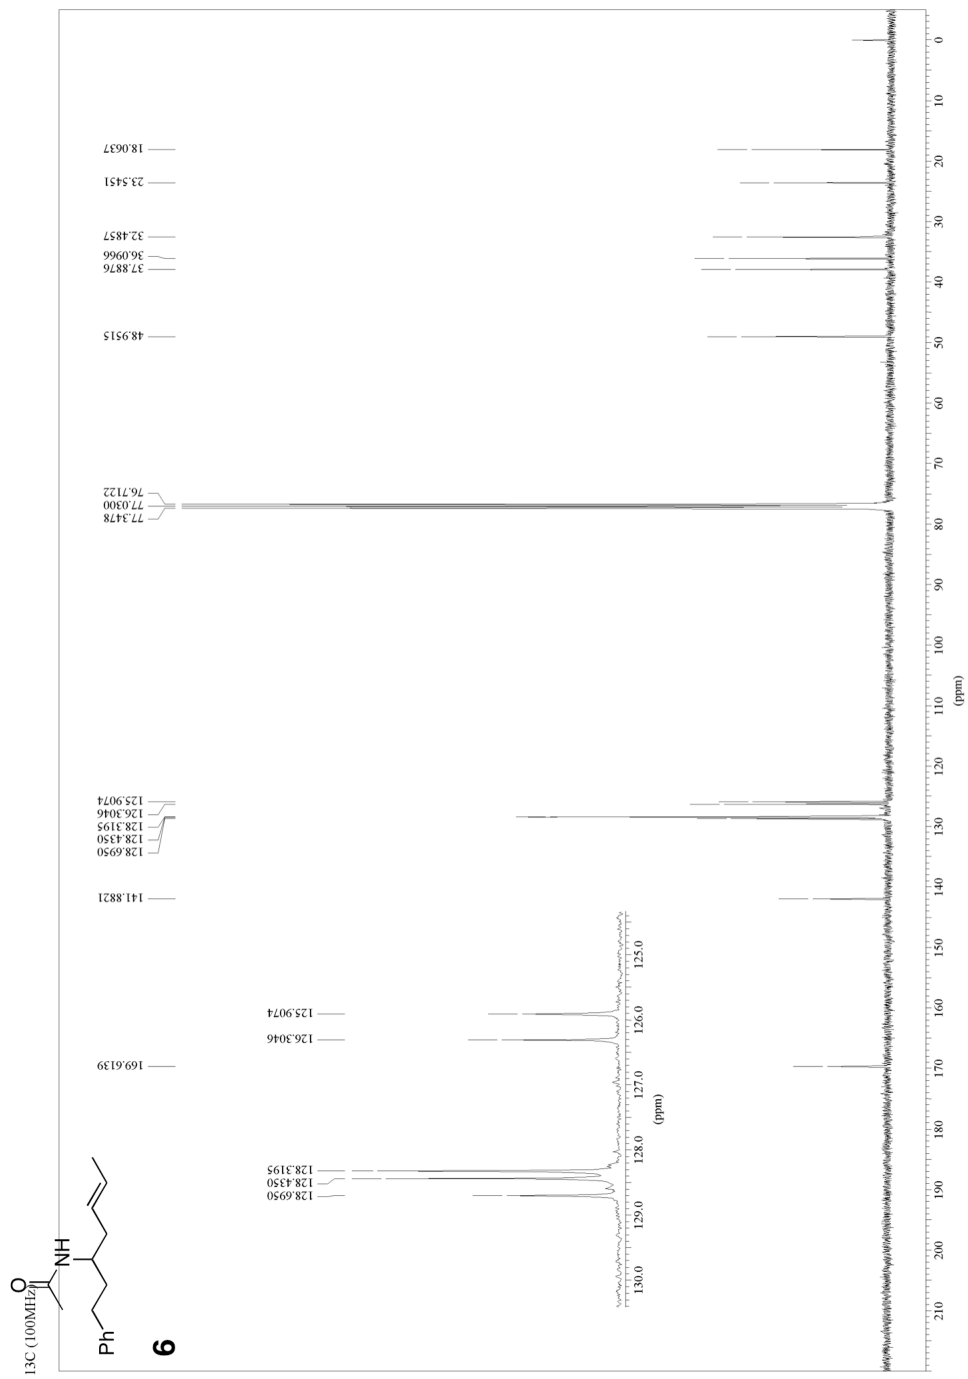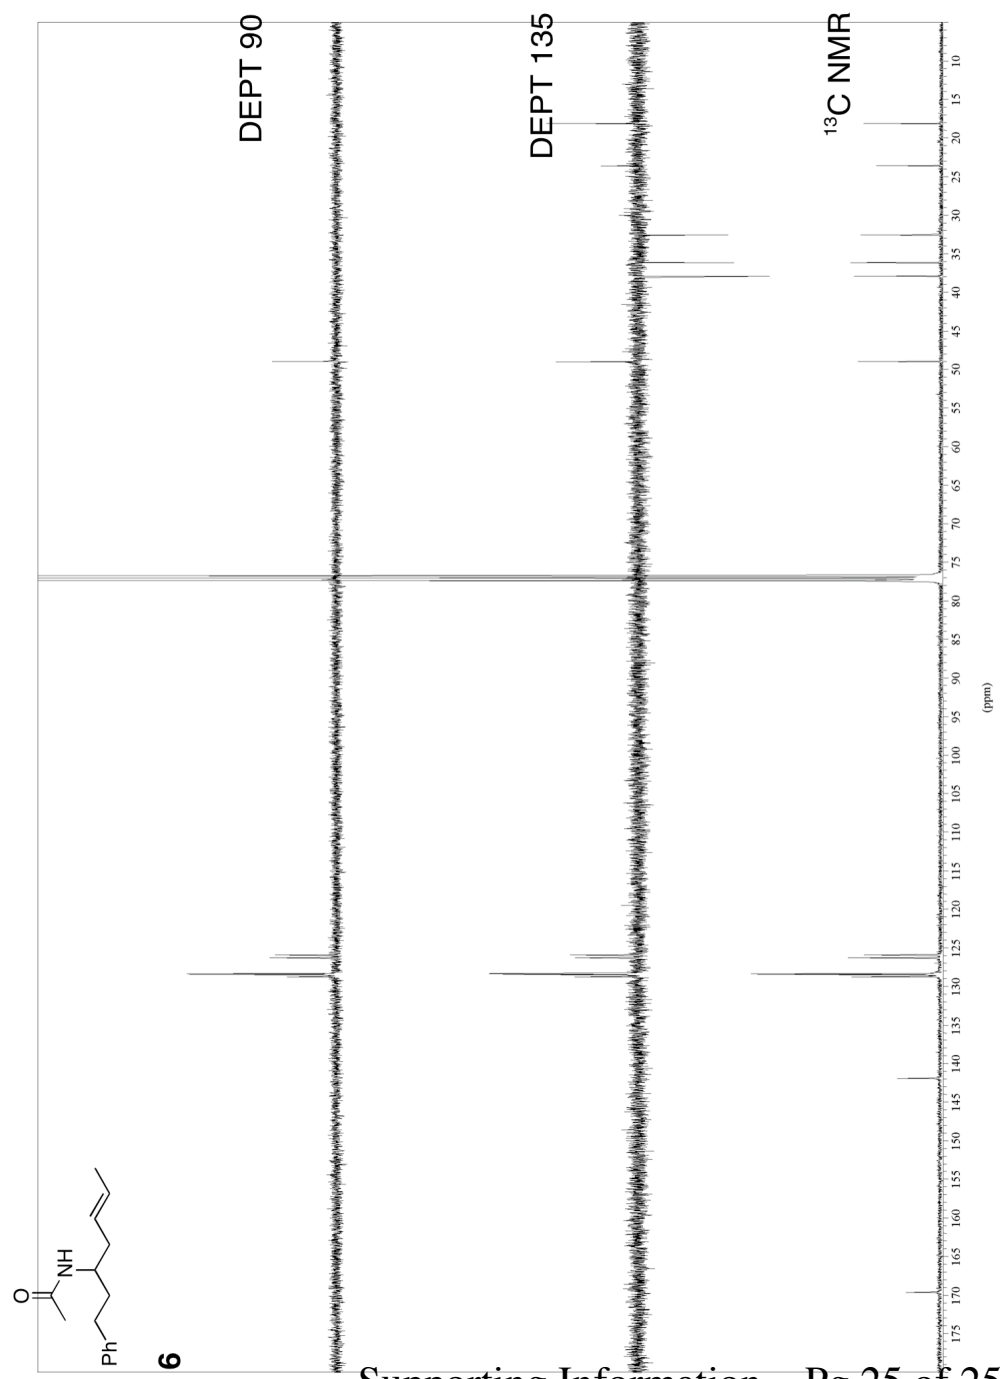

Supplement: Supplementary file 1 [file 4628725]
